# Supplementary material
Source: Royal Society of Chemistry journal article supplement (doi:10.1039/d6ob00414h)

## Supporting Information

# Visible-Light-Driven Eosin Y Catalyzed Arylation of Alkenes with Formate Salt

Yan Huang,<sup>\*a</sup> Jiao Qin,<sup>a</sup> You-Xiang Guo,<sup>a</sup> Li-Rong Chen,<sup>a</sup> Tao Long,<sup>a</sup> Lan-Ying Xu,<sup>a</sup> and Qian Zhang<sup>\*a</sup>

School of Chemistry and Chemical Engineering, Huanggang Normal University,  
Huanggang 438000, China.

## Content

|                                                                                            |    |
|--------------------------------------------------------------------------------------------|----|
| 1. General Information.....                                                                | 2  |
| 2. General procedures.....                                                                 | 2  |
| 3. Investigation of the key reaction parameters.....                                       | 3  |
| 4. Radical trapping experiment.....                                                        | 5  |
| 5. Determination of photochemical quantum yields by standard ferrioxalate actinometry..... | 6  |
| 6. UV-Vis study.....                                                                       | 6  |
| 7. Cyclic voltammetry studies.....                                                         | 7  |
| 8. Stern-Volmer emission quenching.....                                                    | 8  |
| 9. The proposed mechanism of the oxygen tolerance.....                                     | 9  |
| 10. Formate salt solubility test.....                                                      | 9  |
| 11. DFT calculation.....                                                                   | 10 |
| 12. Characterization data.....                                                             | 12 |
| 13. References.....                                                                        | 20 |
| 14. <sup>1</sup> H and <sup>13</sup> C NMR spectra.....                                    | 22 |

## 1. General Information

Chemicals and solvents were purchased from commercial suppliers and used as received.  $^1\text{H}$  NMR,  $^{13}\text{C}$  NMR spectra were recorded on a Bruker AVANCE III 500 MHz spectrometer. Chemical shifts were calibrated using residual undeuterated solvent as an internal reference ( $\text{CDCl}_3$ : 7.26 ppm  $^1\text{H}$  NMR, 77.16 ppm  $^{13}\text{C}$  NMR). Multiplicity was indicated as follows: s (singlet), d (doublet), t (triplet), q (quartet), m (multiplet), dd (doublet of doublet), brs (broad singlet). All gas chromatography-mass spectrometry (GC-MS) spectra were obtained on an Agilent (7890A/5975C) spectrometer. Cyclic voltammetry experiments were performed on a CH Instruments Electrochemical Analyzer. Reactions were monitored using thin layer chromatography (TLC) on glass backed plates and visualised by UV radiation at a wavelength of 254 nm.

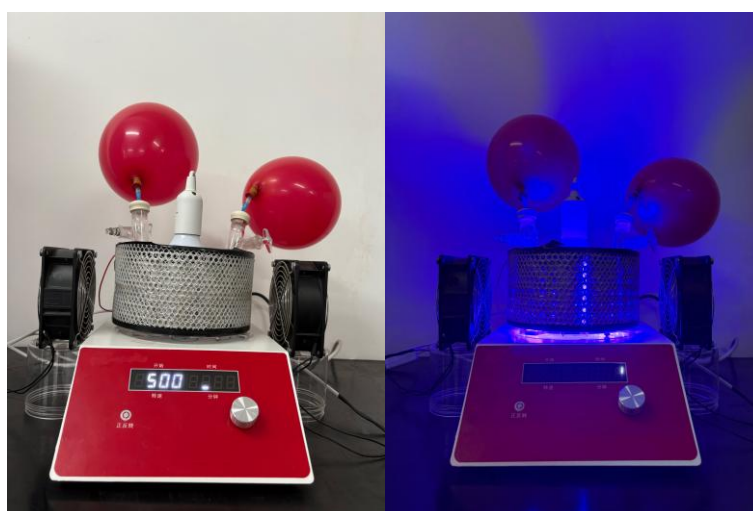

Fig. S1 Blue LED photoreactor

## 2. General procedures

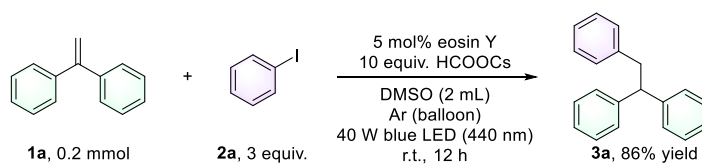

*General Procedure for the Alkene Arylation Products.* An oven-dried Schlenk tube (10 mL) equipped with a magnetic stir bar was charged with HCOOCs (cesium formate, 2 mmol, 355.8 mg, 10 equiv.) and eosin Y (0.01 mmol, 6.8 mg, 5 mol%). The Schlenk tube was sealed and degassed *via* vacuum evacuation and subsequent backfilled with argon for three times. Subsequently, the **1a** (0.2 mmol, 35  $\mu\text{L}$ ), **2a** (0.6 mmol, 63  $\mu\text{L}$ , 3 equiv.) and anhydrous DMSO (2 mL) were added through injection port under argon atmosphere. Then the reaction was placed under a blue LED (wavelength 440 nm, 40 W) with an argon balloon and irradiated at room temperature for 12 h. Upon completion of the reaction, the yield was determined by GC-MS employing 1,3,5-trimethoxybenzene as an internal standard for calibration. The crude product was purified by column chromatography isolation on silica gel (eluent: PE/EA = 500/1

to 200/1 v/v) to give the pure desired product as white solid (**3a**, 44.3 mg, 86% yield).

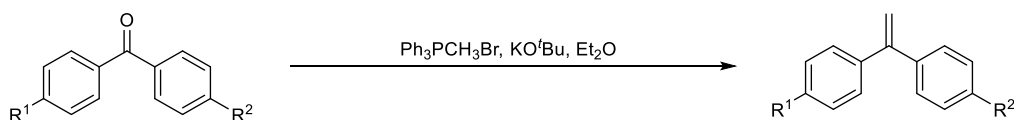

**General Procedure for the Alkene** <sup>[1] [2]</sup>. A round flask equipped with a magnetic stirring bar was charged with  $\text{Ph}_3\text{PCH}_3\text{Br}$  (12 mmol, 1.2 equiv.), and evacuated, backfilled with argon three times, followed by addition of anhydrous  $\text{Et}_2\text{O}$  (50 mL, 0.2 M).  $t\text{BuOK}$  (1.2 equiv) was added to the vigorously stirring solution at room temperature. The resulting solution was cooled to  $0\text{ }^\circ\text{C}$  when a bright yellow heterogeneous mixture was achieved. Then aryl ketone (10 mmol, 1.0 equiv.) was slowly added to the mixture. Upon complete addition, the reaction was allowed to stir at room temperature overnight. Then, the solution was quenched by brine and diluted with ethyl acetate. The organic phase was separated and the aqueous layer was extracted with EA. The combined organic layer was dried over sodium sulfate, and concentrated under vacuum. The product **1** was purified by column chromatography on silica gel using PE/EA (100/1 v/v) as the eluent.

### 3. Investigation of the key reaction parameters

**Table S1** Screening of photocatalysts

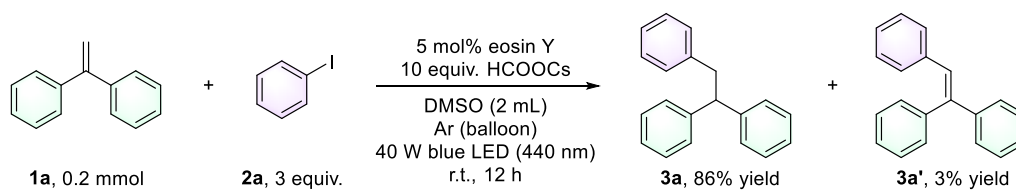

| Entry | Reaction condition <sup>a</sup>       | <b>3a</b> yield (%) <sup>b</sup> | <b>3a'</b> yield (%) <sup>b</sup> |
|-------|---------------------------------------|----------------------------------|-----------------------------------|
| 1     | "standard reaction condition"         | 92 (86 <sup>c</sup> )            | 3                                 |
| 2     | 5 mol% rose bengal instead of eosin Y | 64                               | 3                                 |
| 3     | 5 mol% eosin B instead of eosin Y     | 13                               | 2                                 |
| 4     | 5 mol% riboflavin instead of eosin Y  | 59                               | 3                                 |
| 5     | 10 mol% eosin Y instead of 5 mol%     | 47                               | 7                                 |
| 6     | without riboflavin                    | N.D.                             | N.D.                              |

<sup>a</sup> standard reaction condition: 0.2 mmol **1a**, 5 mol% eosin Y, 3 equiv. **2a**, 10 equiv. HCOOCs, DMSO (2 mL), Ar (balloon), 40 W blue LED (440 nm), r.t., 12 h. <sup>b</sup> Yield determined by GC-MS analysis using 1,3,5-trimethoxybenzene as an internal standard. <sup>c</sup> Isolated yield.

**Table S2** Screening of solvents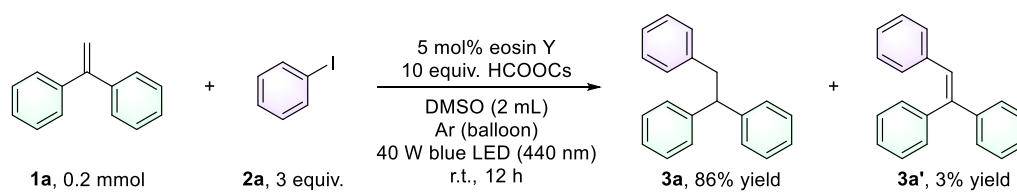

| Entry | Reaction condition <sup>a</sup>  | 3a yield (%) <sup>b</sup> | 3a' yield (%) <sup>b</sup> |
|-------|----------------------------------|---------------------------|----------------------------|
| 1     | "standard reaction condition"    | 92 (86 <sup>c</sup> )     | 3                          |
| 2     | DMF instead of DMSO              | 4                         | 2                          |
| 3     | MeOH instead of DMSO             | 2                         | 1                          |
| 4     | 1,4-dioxane instead of DMSO      | N.D.                      | N.D.                       |
| 5     | H <sub>2</sub> O instead of DMSO | 1                         | 1                          |
| 6     | 3 mL instead of 2 mL DMSO        | 86                        | 2                          |

<sup>a</sup> standard reaction condition: 0.2 mmol **1a**, 5 mol% eosin Y, 3 equiv. **2a**, 10 equiv. HCOOCs, solvent (2 mL), Ar (balloon), 40 W blue LED (440 nm), r.t., 12 h. <sup>b</sup> Yield determined by GC-MS analysis using 1,3,5-trimethoxybenzene as an internal standard. <sup>c</sup> Isolated yield.

**Table S3** Screening of formate salt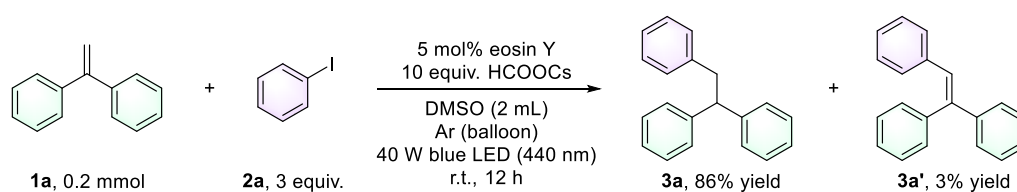

| Entry | Reaction condition <sup>a</sup>                             | 3a yield (%) <sup>b</sup> | 3a' yield (%) <sup>b</sup> |
|-------|-------------------------------------------------------------|---------------------------|----------------------------|
| 1     | "standard reaction condition"                               | 92 (86 <sup>c</sup> )     | 3                          |
| 2     | 10 equiv. HCOONa instead of HCOOCs                          | 5                         | 6                          |
| 3     | 10 equiv. HCOOK instead of HCOOCs                           | 17                        | 9                          |
| 4     | 8 equiv. HCOOCs instead of 10 equiv                         | 81                        | 5                          |
| 5     | 10 equiv. HCOOH instead of HCOOCs                           | N.D.                      | N.D.                       |
| 6     | 10 equiv. Cs <sub>2</sub> CO <sub>3</sub> instead of HCOOCs | N.D.                      | N.D.                       |
| 7     | without HCOOCs                                              | N.D.                      | N.D.                       |

<sup>a</sup> standard reaction condition: 0.2 mmol **1a**, 5 mol% eosin Y, 3 equiv. **2a**, 10 equiv. formate salt, DMSO (2 mL), Ar (balloon), 40 W blue LED (440 nm), r.t., 12 h. <sup>b</sup> Yield determined by GC-MS analysis using 1,3,5-trimethoxybenzene as an internal standard. <sup>c</sup> Isolated yield.

**Table S4** Screening of concentration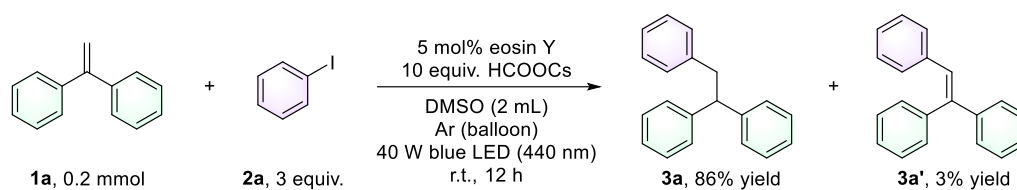

| Entry | Reaction condition <sup>a</sup>           | <b>3a</b> yield (%) <sup>b</sup> | <b>3a'</b> yield (%) <sup>b</sup> |
|-------|-------------------------------------------|----------------------------------|-----------------------------------|
| 1     | "standard reaction condition"             | 92 (86 <sup>c</sup> )            | 3                                 |
| 2     | 1.5 equiv. iodobenzene instead of 3 equiv | 55                               | trace                             |
| 3     | 5 equiv. iodobenzene instead of 3 equiv   | 34                               | 5                                 |
| 4     | 0.1 mmol <b>1a</b> instead of 0.2 mmol    | 8                                | trace                             |
| 5     | 0.3 mmol <b>1a</b> instead of 0.2 mmol    | 28                               | 8                                 |

<sup>a</sup> standard reaction condition: 0.2 mmol **1a**, 5 mol% eosin Y, 3 equiv. **2a**, 10 equiv. HCOOCs, DMSO (2 mL), Ar (balloon), 40 W blue LED (440 nm), r.t., 12 h. <sup>b</sup> Yield determined by GC-MS analysis using 1,3,5-trimethoxybenzene as an internal standard. <sup>c</sup> Isolated yield.

#### 4. Radical trapping experiment

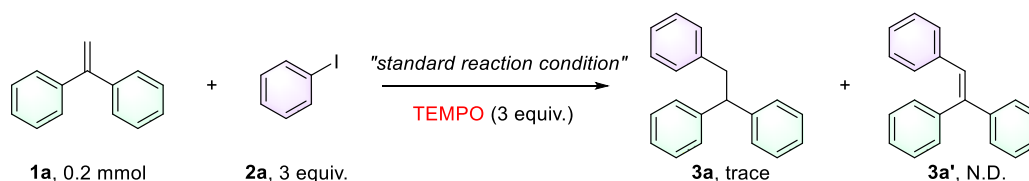

An oven-dried Schlenk tube (10 mL) equipped with a magnetic stir bar was charged with HCOOCs (cesium formate, 2 mmol, 355.8 mg, 10 equiv.), TEMPO (0.6 mmol, 93.8 mg, 3 equiv.) and eosin Y (0.01 mmol, 6.8 mg, 5 mol%). The Schlenk tube was sealed and degassed *via* vacuum evacuation and subsequent backfilled with argon for three times. Subsequently, the **1a** (0.2 mmol, 35  $\mu$ L), **2a** (0.6 mmol, 63  $\mu$ L, 3 equiv.) and anhydrous DMSO (2 mL) were added through injection port under argon atmosphere. Then the reaction was placed under a blue LED (wavelength 440 nm, 40 W) with an argon balloon and irradiated at room temperature for 12 h. Upon completion of the reaction, the yield was determined by GC-MS employing 1,3,5-trimethoxybenzene as an internal standard for calibration.

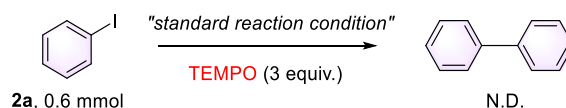

An oven-dried Schlenk tube (10 mL) equipped with a magnetic stir bar was charged with HCOOCs (cesium formate, 2 mmol, 355.8 mg, 10 equiv.), TEMPO (0.6 mmol, 93.8 mg, 3 equiv.) and eosin Y (0.01 mmol, 6.8 mg, 5 mol%). The Schlenk tube was sealed and degassed *via* vacuum evacuation and subsequent backfilled with argon for three times. Subsequently, the **2a** (0.6 mmol, 63  $\mu$ L) and anhydrous DMSO (2 mL) were added through injection port under argon atmosphere. Then the reaction was placed under a blue LED (wavelength 440 nm, 40 W) with an argon balloon and irradiated at room temperature for 12 h. Upon completion of the reaction,

the yield was determined by GC-MS employing 1,3,5-trimethoxybenzene as an internal standard for calibration.

## 5. Determination of photochemical quantum yields by standard ferrioxalate actinometry

The photon flux at 440 nm was calculated to be  $4.67 \times 10^{-9}$  einstein  $s^{-1}$  [3].

*Determination of quantum yield:*

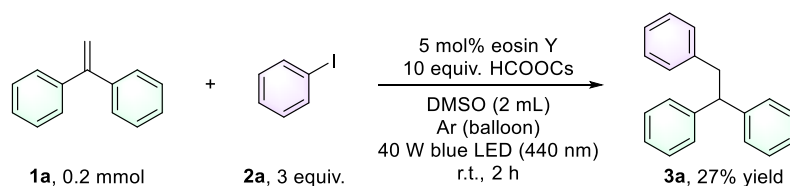

An oven-dried Schlenk tube (10 mL) equipped with a magnetic stir bar was charged with HCOOCs (cesium formate, 2 mmol, 355.8 mg, 10 equiv.) and eosin Y (0.01 mmol, 6.8 mg, 5 mol%). The Schlenk tube was sealed and degassed *via* vacuum evacuation and subsequent backfilled with argon for three times. Subsequently, the **1a** (0.2 mmol, 35  $\mu$ L), **2a** (0.6 mmol, 63  $\mu$ L, 3 equiv.) and anhydrous DMSO (2 mL) were added through injection port under argon atmosphere. Then the reaction was placed under a blue LED (wavelength 440 nm, 40 W) with an argon balloon and irradiated at room temperature for 7200 s (2 h). Upon completion of the reaction, the yield of product formed was determined as 27% yield (0.054 mmol) by GC-MS employing 1,3,5-trimethoxybenzene as an internal standard for calibration. The quantum yield was determined using eq (1). Essentially all incident light ( $f > 0.999$ , *vide infra*) is absorbed by the Eosin Y at the reaction conditions described above.

$$\varphi = \frac{\text{mol product}}{\text{flux} \cdot t \cdot f} \quad (1)$$

$$\varphi = \frac{5.4 \times 10^{-5} \text{ mol}}{4.67 \times 10^{-9} \text{ einstein s}^{-1} \times 7200 \text{ s} \times 1.00} = 1.6$$

## 6. UV-Vis study

**Table S5** Detailed information for preparing UV-Vis samples

| Entry     | HCOOCs | Eosin Y | DMSO | Irradiation time |
|-----------|--------|---------|------|------------------|
| Sample-01 | --     | 1 mg    | 3 mL | --               |
| Sample-02 | --     | 1 mg    | 3 mL | 5 min            |
| Sample-03 | 10 mg  | 1 mg    | 3 mL | --               |
| Sample-04 | 10 mg  | 1 mg    | 3 mL | 5 min            |

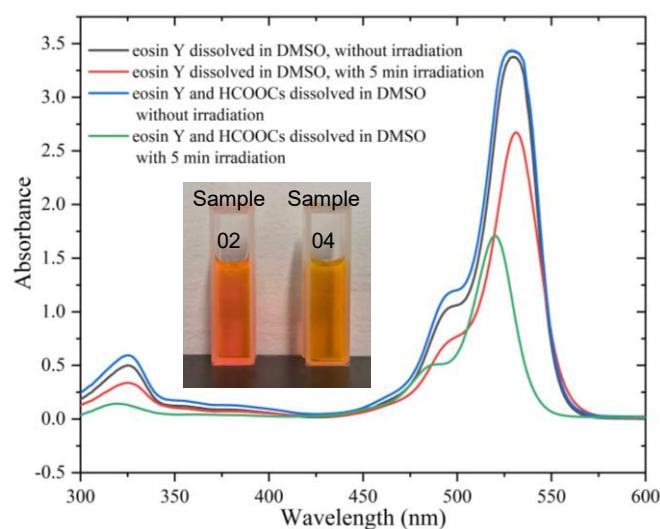

**Fig. S2** UV-Vis absorption spectrum of a mixture of HCOOCs and Eosin Y.

## 7. Cyclic voltammetry studies

Sample 5 mM and tetrabutylammonium tetrafluoroborate 0.1 M in DMSO were used for tests. Measurements were run using glassy carbon working electrode, platinum wire counter electrode, and Hg-HgCl<sub>2</sub> reference electrode in a scan rate of 0.1 V/s.

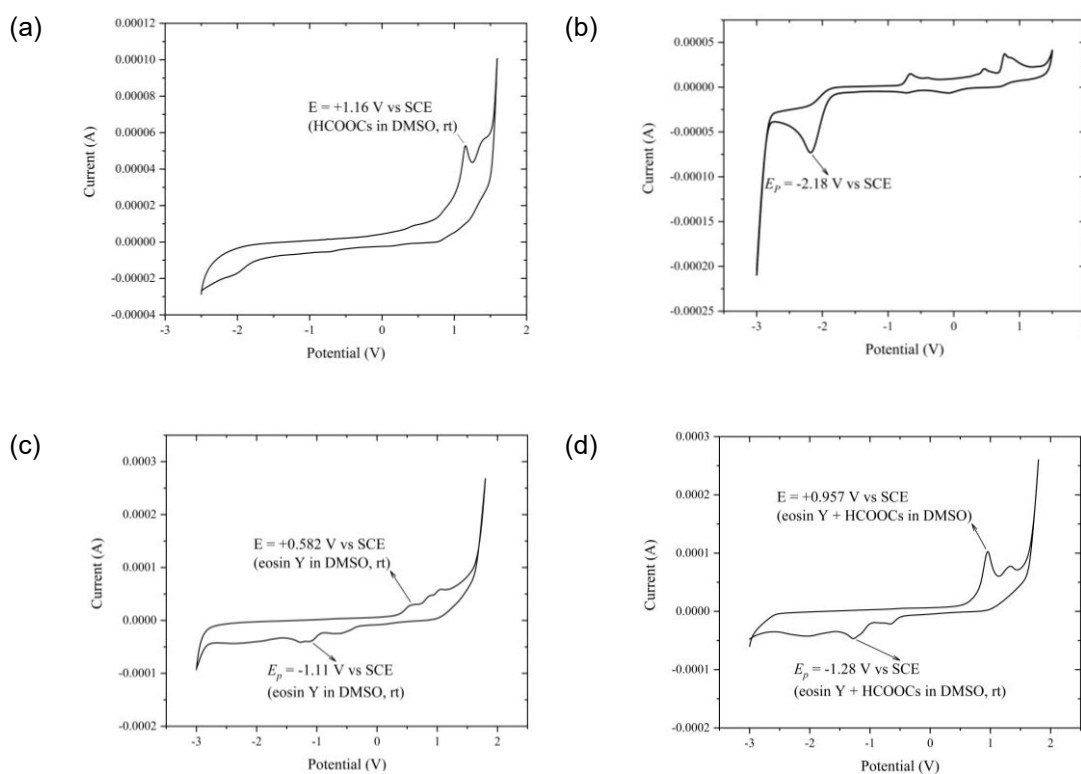

**Fig. S3** (a) Cyclic voltammogram of HCOOCs in DMSO (room temperature). Scanned from -2.5 V to +1.5 V to -2.5 V at 0.1 V/s. (b) Cyclic voltammogram of PhI in DMSO at room temperature. Scanned from -3 V to +1.5 V to -3 V at 0.1 V/s. (c) Cyclic voltammogram of eosin

Y in DMSO at room temperature. Scanned from -3 V to +1.8 V to -3 V at 0.1 V/s. (d) Cyclic voltammogram of eosin Y + HCOOCs in DMSO at room temperature. Scanned from -3 V to +1.8 V to -3 V at 0.1 V/s. (The supporting electrolyte was a 0.1 M solution of tetrabutylammonium tetrafluoroborate in DMSO)

## 8. Stern-Volmer emission quenching

From Stern-Volmer quenching studies, we found that luminescence of Eosin Y was efficiently quenched by HCOOCs but not the PhI and olefin (1,1-diphenylethylene).

HCOOCs: A stock solution of HCOOCs ( $10^{-3}$  M) was prepared. Then, 20  $\mu$ L of this stock solution were added to 2.0 mL of Eosin Y in DMSO ( $10^{-5}$  M).

1,1-diphenylethylene (**1a**): A stock solution of PhI ( $10^{-3}$  M) was prepared. Then, 20  $\mu$ L of this stock solution were added to 2.0 mL of Eosin Y in DMSO ( $10^{-5}$  M).

PhI (**2a**): A stock solution of PhI ( $10^{-3}$  M) was prepared. Then, 20  $\mu$ L of this stock solution were added to 2.0 mL of Eosin Y in DMSO ( $10^{-5}$  M).

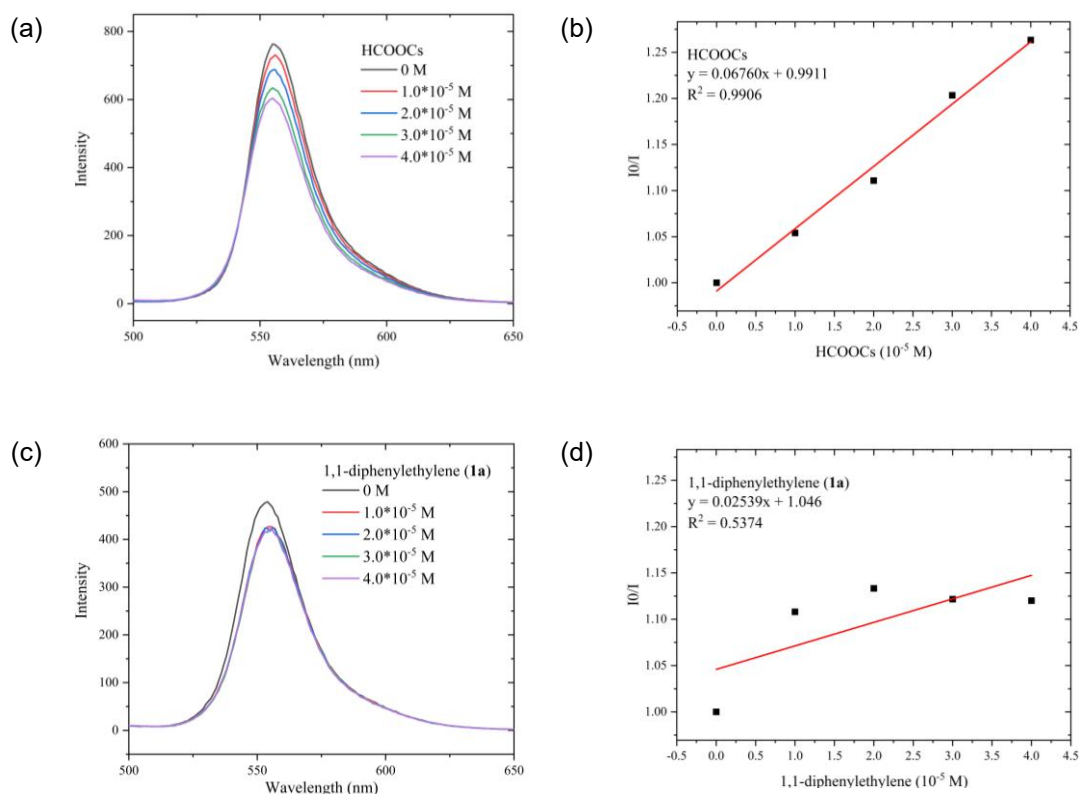

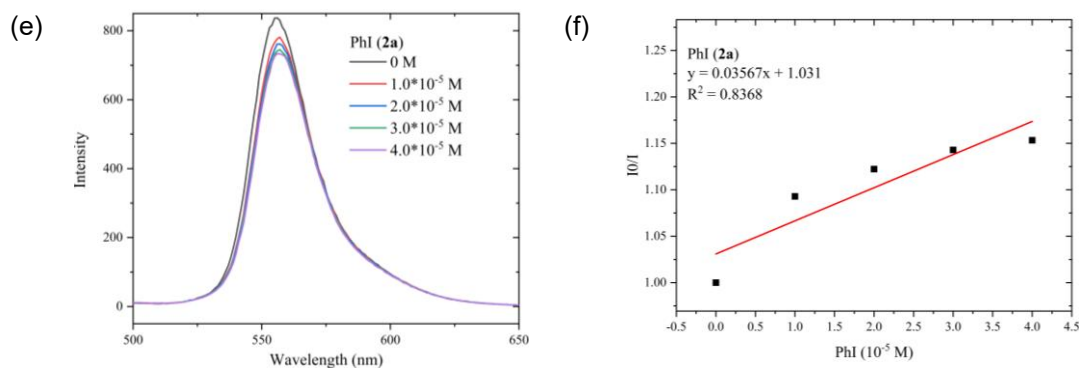

**Fig. S4** Fluorescence quenching experiments

## 9. The proposed mechanism of the oxygen tolerance

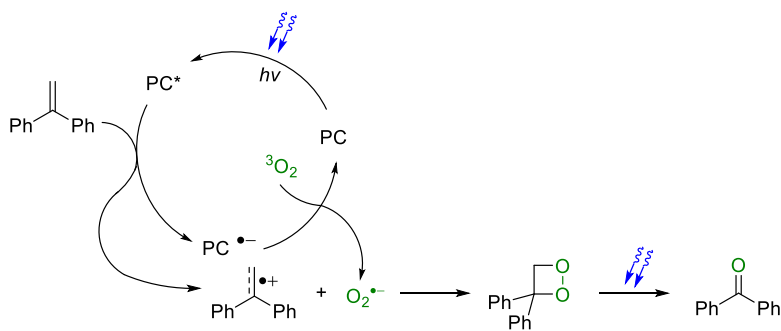

**Fig. S5** The proposed mechanism of the oxygen tolerance

## 10. Formate salt solubility test

*Details of HCOOCs solubility test experiment:* HCOOCs (138.5 mg, 779  $\mu$ mol) and  $CH_2Br_2$  (54.0  $\mu$ L, 769  $\mu$ mol, 0.988 equiv.) were added to a 2 dram vial.  $DMSO-d_6$  (1 mL) was then added and the mixture was violently shaken for 30 s and  $2 \times 10$  s. Solubility was determined via  $^1H$  NMR.

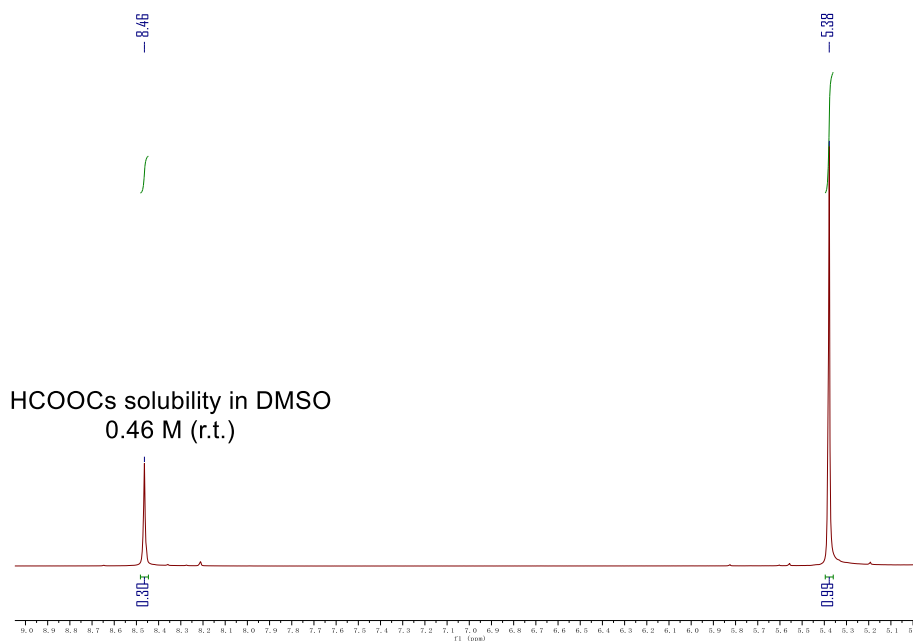

*Details of HCOOK solubility test experiment:* HCOOK (65.5 mg, 779  $\mu\text{mol}$ ) and  $\text{CH}_2\text{Br}_2$  (54.0  $\mu\text{L}$ , 769  $\mu\text{mol}$ , 0.988 equiv.) were added to a 2 dram vial.  $\text{DMSO-}d_6$  (1 mL) was then added and the mixture was violently shaken for 30 s and  $2 \times 10$  s. Solubility was determined via  $^1\text{H}$  NMR.

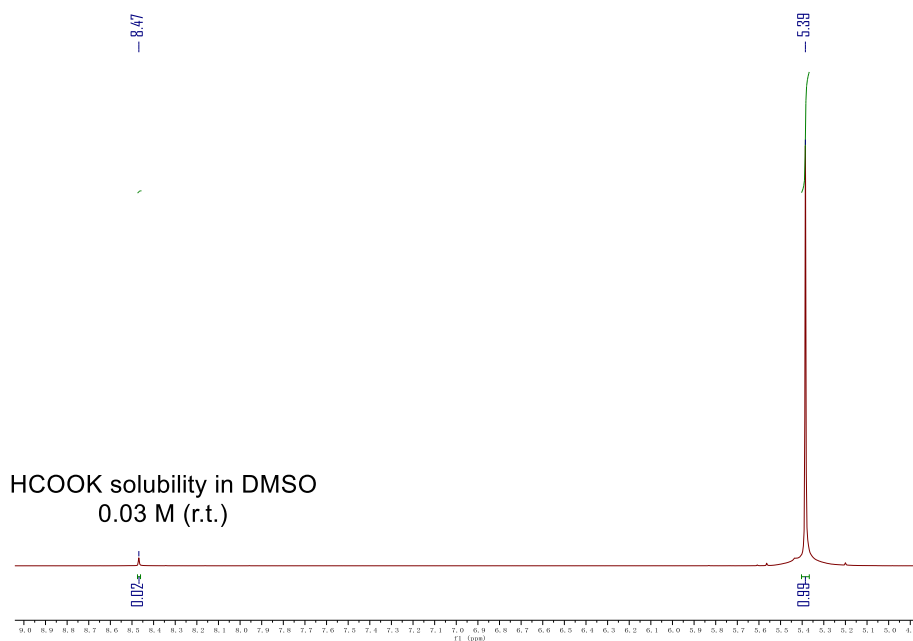

## 11. DFT calculation

**Table S6** Detailed information for DFT calculation

| Entry | Chemical structure | Geometric optimization structure | G [a.u.] <sup>a</sup> |
|-------|--------------------|----------------------------------|-----------------------|
|-------|--------------------|----------------------------------|-----------------------|



|   |             |             |             |
|---|-------------|-------------|-------------|
| H | -4.88250900 | 1.32009600  | 0.85414500  |
| H | -5.97938000 | -0.21570000 | -0.76392200 |
| C | -0.00237400 | 1.15953800  | 0.14868800  |
| C | 0.99697800  | 1.22878400  | 1.12308000  |
| C | -0.35215400 | 2.33833100  | -0.51713600 |
| C | 1.63193700  | 2.43078200  | 1.40394800  |
| H | 1.25876900  | 0.33257200  | 1.67395900  |
| C | 0.28187700  | 3.53990800  | -0.23654700 |
| H | -1.13530100 | 2.30235200  | -1.26637700 |
| C | 1.28375200  | 3.59048900  | 0.72471700  |
| H | 2.40399600  | 2.45853700  | 2.16348300  |
| H | -0.00399600 | 4.43741700  | -0.77270100 |
| H | 1.78286300  | 4.52616500  | 0.94585600  |
| C | 0.17232300  | -1.01576000 | -1.19282500 |
| H | -0.16274400 | -2.04839000 | -1.06357200 |
| C | 1.66517100  | -0.96551000 | -1.00021000 |
| C | 2.42634300  | 0.03611000  | -1.60020500 |
| C | 2.31227700  | -1.89918000 | -0.19439000 |
| C | 3.79618900  | 0.11140400  | -1.39949900 |
| H | 1.92736500  | 0.78090800  | -2.21095700 |
| C | 3.68415700  | -1.82453000 | 0.01153000  |
| H | 1.72676900  | -2.67607500 | 0.28442400  |
| C | 4.43119800  | -0.82051600 | -0.58822600 |
| H | 4.36621900  | 0.90485000  | -1.86776700 |
| H | 4.16747400  | -2.55283900 | 0.65106700  |
| H | 5.50004000  | -0.76112500 | -0.42228500 |
| H | -0.05934200 | -0.71570400 | -2.22438200 |
| C | -0.63191800 | -0.14294300 | -0.22535200 |
| C | -0.20331800 | -1.93604400 | 1.85713200  |
| H | -0.44278000 | -0.97621500 | 0.98645700  |
| O | -0.47154300 | -3.02512000 | 1.35991300  |
| O | 0.25153400  | -1.52728900 | 2.91667500  |

Int-1

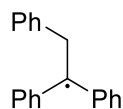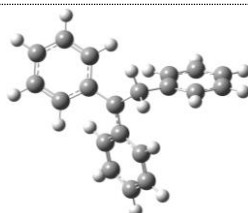

-772.033123

<sup>a</sup> calculated at (u)m062x-gd3/def2tzvp/SMD(DMSO) level

## 12. Characterization data

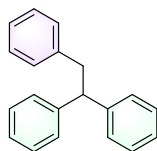

### 1,1,2-triphenylethane (3a)

44.3 mg, white solid, 86% yield.

R<sub>f</sub> (PE/EA 200/1 v/v): 0.35

<sup>1</sup>H NMR (500 MHz, CDCl<sub>3</sub>) δ 7.27 – 7.20 (m, 8H), 7.19 – 7.10 (m, 5H), 7.00 (d, *J* = 6.99 Hz, 2H), 4.23 (t, *J* = 7.82 Hz, 1H), 3.37 (d, *J* = 7.86 Hz, 2H).

The spectral data were in accordance with those reported in the literature.<sup>[4] [5] [6]</sup>

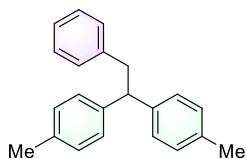

**4,4'-(2-phenylethane-1,1-diyl)bis(methyl-benzene) (3b)**

30.0 mg, white solid, 52% yield.

R<sub>f</sub> (PE/EA 200/1 v/v): 0.35

**<sup>1</sup>H NMR** (500 MHz, CDCl<sub>3</sub>) δ 7.17 (t, *J* = 7.28 Hz, 2H), 7.11 – 7.00 (m, 11H), 4.17 (t, *J* = 7.79 Hz, 1H), 3.32 (d, *J* = 7.78 Hz, 2H).

The spectral data were in accordance with those reported in the literature.<sup>[6]</sup>

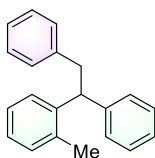

**(1-(o-tolyl)ethane-1,2-diyl)dibenzene (3c)**

19.3 mg, white solid, 35% yield.

R<sub>f</sub> (PE/EA 200/1 v/v): 0.35

**<sup>1</sup>H NMR** (500 MHz, CDCl<sub>3</sub>) δ 7.22 – 7.06 (m, 12H), 6.97 (d, *J* = 7.33 Hz, 2H), 4.41 (t, *J* = 7.67 Hz, 1H), 3.33 (d, *J* = 7.28 Hz, 2H), 2.12 (s, 3H).

The spectral data were in accordance with those reported in the literature.<sup>[4]</sup>

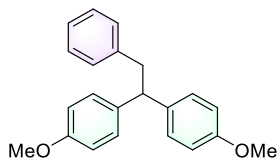

**4,4'-(2-phenylethane-1,1-diyl)bis(methoxybenzene) (3d)**

21.9 mg, white solid, 34% yield.

R<sub>f</sub> (PE/EA 200/1 v/v): 0.1

**<sup>1</sup>H NMR** (500 MHz, CDCl<sub>3</sub>) δ 7.17 (t, *J* = 7.27 Hz, 2H), 7.13 – 7.08 (m, 5H), 7.00 (t, *J* = 6.46 Hz, 2H), 6.79 (d, *J* = 8.67 Hz, 4H), 4.14 (t, *J* = 7.80 Hz, 1H), 3.76 (s, 6H), 3.29 (d, *J* = 7.81 Hz, 2H).

The spectral data were in accordance with those reported in the literature.<sup>[6]</sup>

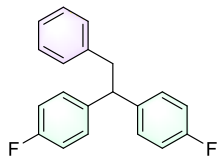

**4,4'-(2-phenylethane-1,1-diyl)bis(fluorobenzene) (3e)**

41.9 mg, white solid, 71% yield.

R<sub>f</sub> (PE/EA 200/1 v/v): 0.35

**<sup>1</sup>H NMR** (500 MHz, CDCl<sub>3</sub>) δ 7.19 – 7.09 (m, 7H), 7.00 – 6.89 (m, 6H), 4.19 (t, *J* = 7.85 Hz, 1H), 3.29 (d, *J* = 7.86 Hz, 2H).

**<sup>19</sup>F NMR** (471 MHz, CDCl<sub>3</sub>) δ -116.8.

The spectral data were in accordance with those reported in the literature.<sup>[7]</sup>

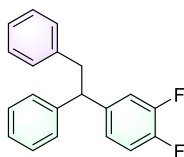

**(1-(3,4-difluorophenyl)ethane-1,2-diyl)dibenzene (3f)**

49.1 mg, white solid, 83% yield.

R<sub>f</sub> (PE/EA 200/1 v/v): 0.26

**<sup>1</sup>H NMR** (500 MHz, CDCl<sub>3</sub>) δ 7.29 (t, *J* = 7.57 Hz, 2H), 7.22 – 7.13 (m, 6H), 7.04 – 6.94 (m, 4H), 6.90 – 6.84 (m, 1H), 4.20 (t, *J* = 7.85 Hz, 1H), 3.38 – 3.25 (m, 2H).

**<sup>19</sup>F NMR** (471 MHz, CDCl<sub>3</sub>) δ -137.9 (d, *J* = 21.16 Hz), -141.5 (d, *J* = 21.32 Hz).

The spectral data were in accordance with those reported in the literature.<sup>[8]</sup>

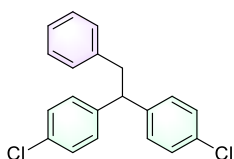

**4,4'-(2-phenylethane-1,1-diyl)bis(chlorobenzene) (3g)**

40.8 mg, white solid, 62% yield.

R<sub>f</sub> (PE/EA 200/1 v/v): 0.35

**<sup>1</sup>H NMR** (500 MHz, CDCl<sub>3</sub>) δ 7.21 (d, *J* = 8.41 Hz, 4H), 7.19 – 7.12 (m, 3H), 7.08 (d, *J* = 8.48 Hz, 4H), 7.00 – 6.95 (m, 2H), 4.18 (t, *J* = 7.82 Hz, 1H), 3.29 (d, *J* = 7.86 Hz, 2H).

The spectral data were in accordance with those reported in the literature.<sup>[9]</sup>

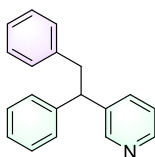

**3-(1,2-diphenylethyl)pyridine (3h)**

42.7 mg, white solid, 82% yield.

R<sub>f</sub> (PE/EA 4/1 v/v): 0.55

**<sup>1</sup>H NMR** (500 MHz, CDCl<sub>3</sub>) δ 8.45 (d, *J* = 5.39 Hz, 2H), 7.30 – 7.26 (m, 2H), 7.23 – 7.14 (m, 6H), 7.09 (d, *J* = 6.15 Hz, 2H), 6.99 (d, *J* = 6.97 Hz, 2H), 4.20 (t, *J* = 7.85 Hz, 1H), 3.35 (qd, *J* = 13.68, 7.88 Hz, 2H).

The spectral data were in accordance with those reported in the literature.<sup>[6]</sup>

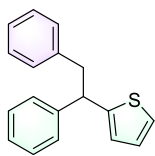

**2-(1,2-diphenylethyl)thiophene (3i)**

18.2 mg, white solid, 34% yield.

R<sub>f</sub> (PE/EA 200/1 v/v): 0.35

**<sup>1</sup>H NMR** (500 MHz, CDCl<sub>3</sub>) δ 7.25 – 7.22 (m, 2H), 7.21 – 7.15 (m, 5H), 7.14 – 7.09 (m, 2H), 7.01 (d, *J* = 7.14 Hz, 2H), 6.90 – 6.85 (m, 1H), 6.79 (d, *J* = 3.26 Hz, 1H), 4.43 (t, *J* = 7.75 Hz, 1H), 3.43 (dd, *J* = 13.60, 7.25 Hz, 1H), 3.30 (dd, *J* = 13.57, 8.25 Hz, 1H).

The spectral data were in accordance with those reported in the literature.<sup>[4] [6]</sup>

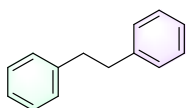

**1,2-diphenylethane (3j)**

14.0 mg, white solid, 38% yield.

R<sub>f</sub> (PE/EA 200/1 v/v): 0.67

**<sup>1</sup>H NMR** (500 MHz, CDCl<sub>3</sub>) δ 7.29 (t, *J* = 7.62 Hz, 4H), 7.24 – 7.16 (m, 6H), 2.93 (s, 4H).

The spectral data were in accordance with those reported in the literature.<sup>[5]</sup>

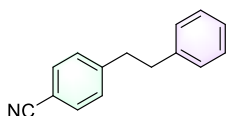

**4-phenethylbenzonitrile (3k)**

12.2 mg, white solid, 29% yield.

R<sub>f</sub> (PE/EA 200/1 v/v): 0.20

**<sup>1</sup>H NMR** (500 MHz, CDCl<sub>3</sub>) δ 7.55 (d, *J* = 8.26 Hz, 2H), 7.28 – 7.20 (m, 5H), 7.12 (d, *J* = 7.06 Hz, 2H), 3.09 – 2.81 (m, 4H).

The spectral data were in accordance with those reported in the literature.<sup>[5]</sup>

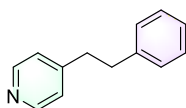

**4-phenethylpyridine (3l)**

4.9 mg, white solid, 13% yield.

R<sub>f</sub> (PE/EA 4/1 v/v): 0.45

**<sup>1</sup>H NMR** (500 MHz, CDCl<sub>3</sub>) δ 8.48 (d, *J* = 5.06 Hz, 2H), 7.28 (t, *J* = 7.47 Hz, 2H), 7.21 (t, *J* = 7.40 Hz, 1H), 7.15 (d, *J* = 7.06 Hz, 2H), 7.08 (d, *J* = 5.67 Hz, 2H), 2.93 (s, 4H).

The spectral data were in accordance with those reported in the literature.<sup>[10]</sup>

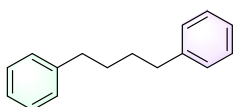

**1,4-diphenylbutane (3m)**

24.6 mg, white solid, 58% yield.

R<sub>f</sub> (PE/EA 200/1 v/v): 0.60

**<sup>1</sup>H NMR** (500 MHz, CDCl<sub>3</sub>) δ 7.27 – 7.25 (m, 5H), 7.18 – 7.15 (m, 5H), 2.63 (t, *J* = 6.90 Hz, 4H), 1.68 – 1.65 (m, 4H).

The spectral data were in accordance with those reported in the literature.<sup>[11]</sup>

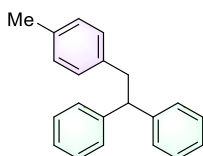

**(2-(*p*-tolyl)ethane-1,1-diyl)dibenzene (3n)**

48.6 mg, white solid, 89% yield.

R<sub>f</sub> (PE/EA 200/1 v/v): 0.35

**<sup>1</sup>H NMR** (500 MHz, CDCl<sub>3</sub>) δ 7.26 – 7.19 (m, 8H), 7.18 – 7.13 (m, 2H), 6.97 (d, *J* = 7.86 Hz, 2H), 6.89 (d, *J* = 7.94 Hz, 2H), 4.21 (t, *J* = 7.79 Hz, 1H), 3.33 (d, *J* = 7.77 Hz, 2H), 2.26 (s, 3H).

The spectral data were in accordance with those reported in the literature.<sup>[4]</sup>

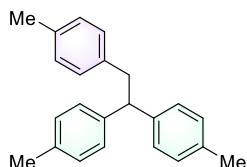

**4,4',4''-(ethane-1,1,2-triyl)tris(methylbenzene) (3o)**

22.4 mg, yellow solid, 37% yield.

R<sub>f</sub> (PE/EA 200/1 v/v): 0.30

**<sup>1</sup>H NMR** (500 MHz, CDCl<sub>3</sub>) δ 7.09 (d, *J* = 8.08 Hz, 4H), 7.04 (d, *J* = 5.76 Hz, 4H), 6.97 (d, *J* = 7.75 Hz, 2H), 6.91 (d, *J* = 7.71 Hz, 2H), 4.15 (t, *J* = 7.75 Hz, 1H), 3.29 (d, *J* = 7.70 Hz, 2H), 2.28 (s, 6H), 2.26 (s, 3H).

**<sup>13</sup>C NMR** (126 MHz, CDCl<sub>3</sub>) δ 142.0, 135.6, 129.1, 129.0, 128.9, 128.0, 52.4, 41.8, 21.1.

The spectral data were in accordance with those reported in the literature.<sup>[12]</sup>

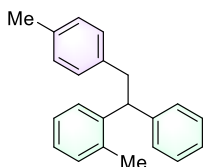

**1-methyl-2-(1-phenyl-2-(p-tolyl)ethyl)benzene (3p)**

34.4 mg, yellow solid, 60% yield.

R<sub>f</sub> (PE/EA 200/1 v/v): 0.38

**<sup>1</sup>H NMR** (500 MHz, CDCl<sub>3</sub>) δ 7.41 (d, *J* = 7.70 Hz, 1H), 7.21 (t, *J* = 7.39 Hz, 3H), 7.15 – 7.06 (m, 5H), 6.97 (d, *J* = 7.80 Hz, 2H), 6.87 (d, *J* = 7.89 Hz, 2H), 4.40 (t, *J* = 7.68 Hz, 1H), 3.29 (dd, *J* = 7.63, 2.40 Hz, 2H), 2.27 (s, 3H), 2.13 (s, 3H).

The spectral data were in accordance with those reported in the literature.<sup>[13]</sup>

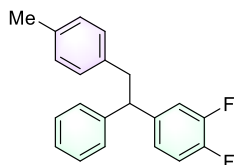

**1,2-difluoro-4-(1-phenyl-2-(p-tolyl)ethyl)benzene (3q)**

51.2 mg, white solid, 83% yield.

R<sub>f</sub> (PE/EA 200/1 v/v): 0.45

**<sup>1</sup>H NMR** (500 MHz, CDCl<sub>3</sub>) δ 7.28 (d, *J* = 7.66 Hz, 2H), 7.18 (d, *J* = 7.51 Hz, 3H), 7.03 – 6.93 (m, 4H), 6.87 (d, *J* = 7.57 Hz, 3H), 4.16 (t, *J* = 7.87 Hz, 1H), 3.33 – 3.19 (m, 2H), 2.27 (s, 3H).

**<sup>19</sup>F NMR** (471 MHz, CDCl<sub>3</sub>) δ -138.0 (d, *J* = 21.1 Hz), -141.6 (d, *J* = 20.9 Hz).

The spectral data were in accordance with those reported in the literature.<sup>[8]</sup>

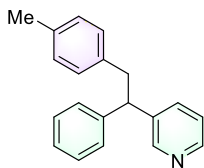

**3-(1-phenyl-2-(p-tolyl)ethyl)pyridine (3r)**

47.0 mg, yellow solid, 86% yield.

R<sub>f</sub> (PE/EA 4/1 v/v): 0.73

**<sup>1</sup>H NMR** (500 MHz, CDCl<sub>3</sub>) δ 8.45 (d, *J* = 6.13 Hz, 2H), 7.28 (t, *J* = 7.63 Hz, 2H), 7.20 (d, *J* = 8.49 Hz, 3H), 7.10 (d, *J* = 6.12 Hz, 2H), 6.99 (d, *J* = 7.73 Hz, 2H), 6.89 (d, *J* = 7.81 Hz, 2H), 4.19 (t, *J* = 7.83 Hz, 1H), 3.31 (qd, *J* = 13.72, 7.79 Hz, 2H), 2.27 (s, 3H).

**<sup>13</sup>C NMR** (126 MHz, CDCl<sub>3</sub>) δ 153.5, 149.8, 142.9, 136.3, 135.8, 129.1, 128.9, 128.7, 128.1, 126.9, 123.6, 52.7, 41.1, 21.1.

The spectral data were in accordance with those reported in the literature.<sup>[14]</sup>

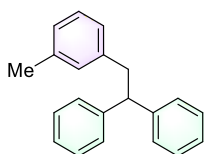

**(2-(m-tolyl)ethane-1,1-diyl)dibenzene (3s)**

33.8 mg, white solid, 62% yield.

R<sub>f</sub> (PE/EA 200/1 v/v): 0.55

**<sup>1</sup>H NMR** (500 MHz, CDCl<sub>3</sub>) δ 7.28 – 7.21 (m, 8H), 7.19 – 7.15 (m, 2H), 7.06 (t, *J* = 7.55 Hz, 1H), 6.94 (d, *J* = 7.50 Hz, 1H), 6.84 (s, 1H), 6.80 (d, *J* = 7.56 Hz, 1H), 4.24 (t, *J* = 7.76 Hz, 1H), 3.33 (d, *J* = 7.70 Hz, 2H), 2.25 (s, 3H).

The spectral data were in accordance with those reported in the literature.<sup>[4]</sup>

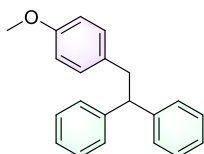

**(2-(4-methoxyphenyl)ethane-1,1-diyl)dibenzene (3t)**

45.8 mg, yellow solid, 79% yield.

R<sub>f</sub> (PE/EA 200/1 v/v): 0.26

**<sup>1</sup>H NMR** (500 MHz, CDCl<sub>3</sub>) δ 7.25 – 7.14 (m, 8H), 7.16 (t, *J* = 7.12 Hz, 2H), 6.90 (d, *J* = 8.59 Hz, 2H), 6.71 (d, *J* = 8.62 Hz, 2H), 4.18 (t, *J* = 7.76 Hz, 1H), 3.74 (s, 3H), 3.30 (d, *J* = 7.78 Hz, 2H).

The spectral data were in accordance with those reported in the literature.<sup>[4]</sup>

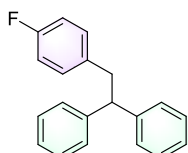

**(2-(4-fluorophenyl)ethane-1,1-diyl)dibenzene (3u)**

46.9 mg, white solid, 85% yield.

R<sub>f</sub> (PE/EA 200/1 v/v): 0.45

**<sup>1</sup>H NMR** (500 MHz, CDCl<sub>3</sub>) δ 7.26 – 7.23 (m, 4H), 7.19 – 7.14 (m, 6H), 6.94 – 6.91 (m, 2H), 6.84 (t, *J* = 8.73 Hz, 2H), 4.16 (t, *J* = 7.85 Hz, 1H), 3.32 (d, *J* = 7.83 Hz, 2H).

**<sup>19</sup>F NMR** (471 MHz, CDCl<sub>3</sub>) δ -117.5.

The spectral data were in accordance with those reported in the literature.<sup>[4]</sup>

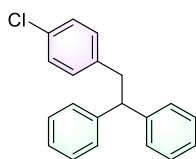

**(2-(4-chlorophenyl)ethane-1,1-diyl)dibenzene (3v)**

48.7 mg, white solid, 83% yield.

R<sub>f</sub> (PE/EA 200/1 v/v): 0.37

**<sup>1</sup>H NMR** (500 MHz, CDCl<sub>3</sub>) δ 7.27 – 7.24 (m, 4H), 7.19 – 7.15 (m, 6H), 7.12 (d, *J* = 8.35 Hz, 2H), 6.91 (d, *J* = 8.37 Hz, 2H), 4.17 (t, *J* = 7.87 Hz, 1H), 3.32 (d, *J* = 7.85 Hz, 2H).

The spectral data were in accordance with those reported in the literature.<sup>[4]</sup>

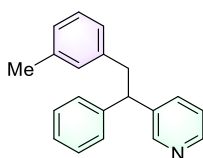

**3-(1-phenyl-2-(*m*-tolyl)ethyl)pyridine (3w)**

31.2 mg, orange solid, 57% yield.

R<sub>f</sub> (PE/EA 4/1 v/v): 0.65

**<sup>1</sup>H NMR** (500 MHz, CDCl<sub>3</sub>) δ 8.46 (d, *J* = 6.17 Hz, 2H), 7.29 (t, *J* = 7.50 Hz, 2H), 7.23 – 7.19 (m, 3H), 7.11 (d, *J* = 6.17 Hz, 2H), 7.07 (t, *J* = 7.55 Hz, 1H), 6.96 (d, *J* = 7.65 Hz, 1H), 6.83 (s, 1H), 6.79 (d, *J* = 7.55 Hz, 1H), 4.22 (t, *J* = 7.81 Hz, 1H), 3.37 – 3.27 (m, 2H), 2.25 (s, 3H).

**<sup>13</sup>C NMR** (126 MHz, CDCl<sub>3</sub>) δ 153.4, 149.8, 142.9, 139.3, 137.9, 129.9, 128.7, 128.2, 128.1, 127.1, 126.9, 126.1, 123.6, 52.6, 41.4, 21.5.

The spectral data were in accordance with those reported in the literature.<sup>[14][16]</sup>

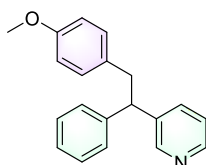

**3-(2-(4-methoxyphenyl)-1-phenylethyl)pyridine (3x)**

27.4 mg, orange solid, 47% yield.

R<sub>f</sub> (PE/EA 4/1 v/v): 0.63

**<sup>1</sup>H NMR** (500 MHz, CDCl<sub>3</sub>) δ 8.46 (d, *J* = 5.24 Hz, 2H), 7.32 – 7.27 (m, 2H), 7.21 (t, *J* = 6.05 Hz, 3H), 7.10 (d, *J* = 6.12 Hz, 2H), 6.91 (d, *J* = 8.38 Hz, 2H), 6.73 (d, *J* = 8.49 Hz, 2H), 4.17 (t, *J* = 7.82 Hz, 1H), 3.75 (s, 3H), 3.30 (qd, *J* = 13.78, 7.82 Hz, 2H).

**<sup>13</sup>C NMR** (126 MHz, CDCl<sub>3</sub>) δ 158.1, 153.4, 149.8, 142.8, 131.4, 130.0, 128.7, 128.1, 126.9, 123.6, 113.8, 55.3, 52.9, 40.6.

The spectral data were in accordance with those reported in the literature.<sup>[15][16]</sup>

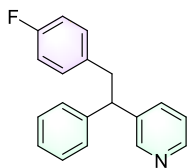

**3-(2-(4-fluorophenyl)-1-phenylethyl)pyridine (3y)**

31.6 mg, orange solid, 57% yield.

R<sub>f</sub> (PE/EA 4/1 v/v): 0.63

**<sup>1</sup>H NMR** (500 MHz, CDCl<sub>3</sub>) δ 8.42 (d, *J* = 6.16 Hz, 2H), 7.26 – 7.21 (m, 2H), 7.19 – 7.16 (m, 1H), 7.15 – 7.11 (m, 2H), 7.05 (d, *J* = 6.13 Hz, 2H), 6.90 – 6.88 (m, 2H), 6.82 (t, *J* = 8.68 Hz, 2H), 4.11 (t, *J* = 7.87 Hz, 1H), 3.33 – 3.24 (m, 2H)

**<sup>13</sup>C NMR** (126 MHz, CDCl<sub>3</sub>) δ 161.5 (d, *J* = 244.38 Hz), 153.1, 149.9, 142.4, 135.0 (d, *J* = 2.50 Hz), 130.5 (d, *J* = 8.75 Hz), 128.8, 128.1, 127.0, 123.5, 115.3, 115.1, 52.8, 40.6.

**<sup>19</sup>F NMR** (471 MHz, CDCl<sub>3</sub>) δ -116.7.

The spectral data were in accordance with those reported in the literature.<sup>[16]</sup>

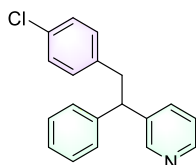

**3-(2-(4-chlorophenyl)-1-phenylethyl)pyridine (3z)**

32.3 mg, yellow solid, 55% yield.

R<sub>f</sub> (PE/EA 4/1 v/v): 0.57

**<sup>1</sup>H NMR** (500 MHz, CDCl<sub>3</sub>) δ 8.43 (d, *J* = 5.40 Hz, 2H), 7.25 – 7.22 (m, 2H), 7.18 (t, *J* = 7.40 Hz, 1H), 7.13 – 7.10 (m, 4H), 7.06 (d, *J* = 6.12 Hz, 2H), 6.87 (d, *J* = 8.43 Hz, 2H), 4.11 (t, *J* = 7.90 Hz, 1H), 3.32 – 3.23 (m, 2H).

**<sup>13</sup>C NMR** (126 MHz, CDCl<sub>3</sub>) δ 153.0, 149.9, 142.3, 137.8, 132.2, 130.4, 128.8, 128.5, 128.1, 127.1, 123.5, 52.6, 40.8.

The spectral data were in accordance with those reported in the literature.<sup>[16]</sup>

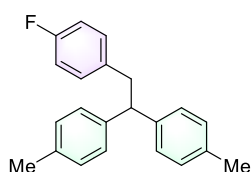

**4,4'-(2-(4-fluorophenyl)ethane-1,1-diyl)bis(methylbenzene) (3aa)**

33.7 mg, white solid, 55% yield.

R<sub>f</sub> (PE/EA 200/1 v/v): 0.43

**<sup>1</sup>H NMR** (500 MHz, CDCl<sub>3</sub>) δ 7.08 – 7.03 (m, 8H), 6.95 – 6.93 (m, 2H), 6.84 (t, *J* = 8.75 Hz, 2H), 4.10 (t, *J* = 7.82 Hz, 1H), 3.29 (d, *J* = 7.85 Hz, 2H), 2.28 (s, 6H).

**<sup>19</sup>F NMR** (471 MHz, CDCl<sub>3</sub>) δ -117.6.

The spectral data were in accordance with those reported in the literature.<sup>[13]</sup>

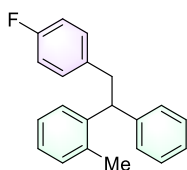

**1-(2-(4-fluorophenyl)-1-phenylethyl)-2-methylbenzene (3ab)**

36.1 mg, white solid, 62% yield.

R<sub>f</sub> (PE/EA 200/1 v/v): 0.45

**<sup>1</sup>H NMR** (500 MHz, CDCl<sub>3</sub>) δ 7.39 (d, *J* = 7.73 Hz, 1H), 7.21 (t, *J* = 7.72 Hz, 3H), 7.16 – 7.06 (m, 5H), 6.92 – 6.81 (m, 4H), 4.34 (t, *J* = 7.73 Hz, 1H), 3.29 (d, *J* = 8.85 Hz, 2H), 2.11 (s, 3H).

**<sup>19</sup>F NMR** (471 MHz, CDCl<sub>3</sub>) δ -117.5.

The spectral data were in accordance with those reported in the literature.<sup>[13]</sup>

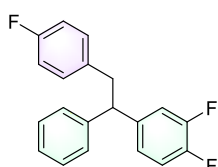

**1,2-difluoro-4-(2-(4-fluorophenyl)-1-phenylethyl)benzene (3ac)**

57.4 mg, white solid, 92% yield.

R<sub>f</sub> (PE/EA 200/1 v/v): 0.51

**<sup>1</sup>H NMR** (500 MHz, CDCl<sub>3</sub>) δ 7.29 (d, *J* = 7.20 Hz, 2H), 7.22 – 7.14 (m, 3H), 7.04 – 6.90 (m, 4H), 6.86 (t, *J* = 8.70 Hz, 3H), 4.12 (t, *J* = 7.90 Hz, 1H), 3.33 – 3.21 (m, 2H).

**<sup>19</sup>F NMR** (471 MHz, CDCl<sub>3</sub>) δ -117.0, -137.7 (d, *J* = 21.3 Hz), -141.3 (d, *J* = 21.2 Hz).

The spectral data were in accordance with those reported in the literature.<sup>[8]</sup>

### 13. References

- [1] X. Y. Zhang, W. B. Wu, W. D. Cao, H. Yu, X. Xu, X. H. Liu, X. M. Feng, Enantioselective Radical-Polar Crossover Reactions of Indanonecarboxamides with Alkenes. *Angew. Chem. Int. Ed.* **2020**, *59*, 4846-4850.
- [2] H. C. Cheng, T. L. Lam, Y. G. Liu, Z. Tang, C. M. Che, Photoinduced Hydroarylation and Cyclization of Alkenes with Luminescent Platinum(II) Complexes. *Angew. Chem. Int. Ed.* **2021**, *60*, 1383-1389.
- [3] Y. Huang, J. Hou, L. W. Zhan, Q. Zhang, W. Y. Tang, B. D. Li, Photoredox Activation of Formate Salts: Hydrocarboxylation of Alkenes via Carboxyl Group Transfer. *ACS Catal.* **2021**, *11*(24), 15004-15012.
- [4] Y. H. Lai and P. J. Milner, Paired Electrolysis Enables Reductive Heck Coupling of Unactivated (Hetero)Aryl Halides and Alkenes. *Angew. Chem. Int. Ed.* **2024**, *63*, e202408834.
- [5] X. L. Li, J. F. Zhou, W. J. Deng, Z. L. Wang, Y. T. Wen, Z. J. Li, Y. A. Qiu, Y. B. Huang, Electroreductive Deuteroarylation of Alkenes Enabled by An Organo-mediator. *Chem. Sci.* **2024**, *15*, 11418-11427.
- [6] N. Assani, L. Delfau, P. Smits, S. Redon, Y. Kabri, E. Tomás-Mendivil, P. Vanelle, D. Martin, J. Broggi, A Simple N-heterocyclic Carbene for the Catalytic Up-conversion of Aldehydes into Stoichiometric Super Electron Donors. *Chem. Sci.* **2024**, *15*, 14699-14704.

- [7] K. Nozawa-Kumada, S. Onuma, K. Ono, T. Kumagai, Y. Iwakawa, K. Sato, M. Shigeno, Y. Kondo, Transition-Metal-Free Intermolecular Hydrocarbonation of Styrenes Mediated by NaH/1,10-Phenanthroline. *Chem. Eur. J.* **2023**, *29*, e202203143.
- [8] J. F. Hartwig, D. W. Robbins, S. J. Herzon, Preparation of arylalkenes and related compounds by addition or hydroarylation reactions the the catalyst screening. US20130274144 A1.
- [9] B. Huang, Z. Zhang, J. Jiao, W. Liu, X. Yan, Redox-Paired Reductive Heck Reaction and Oxidative Esterification Catalyzed by Mesoionic Carbenes. *Organic Letters* **2024**, *26*(35), 7419-7424.
- [10] H. Wang, L. Lu, B. Xiong, Y. Ling, X. Zeng, X. Qiu, Nickel-Catalyzed Transfer Hydrogenation of Unactivated Aryl Alkenes with Hydrosilane as Hydrogen Source. *Asian J. Org. Chem.* **2023**, *12*, e202200590.
- [11] Y. Gao, C. Yang, S. Bai, X. Liu, Q. Wu, J. Wang, C. Jiang, X. Qi, Visible-Light-Induced Nickel-Catalyzed Cross-Coupling with Alkylzirconocenes from Unactivated Alkenes. *Chem* **2020**, *6*(3), 675-688.
- [12] J. Coops, G. J. Hoijtink, T. J. E. Kramer, Thermochemical investigations of arylethanes. II. Heats of combustion of some p- and o-tolyethanes and phenylbutanes. *Recueil des Travaux Chimiques des Pays-Bas et de la Belgique* **1953**, *72*, 785-792.
- [13] B. Chen, P. Cao, X. Yin, Y. Liao, L. Jiang, J. Ye, M. Wang, J. Liao, Modular Synthesis of Enantioenriched 1,1,2-Triarylethanes by an Enantioselective Arylboration and Cross-Coupling Sequence. *ACS Catal.* **2017**, *7*(4), 2425-2429.
- [14] C. M. Crudden, C. Ziebenhaus, J. P. G. Rygus, K. Ghazati, P. J. Unsworth, M. Nambo, S. Voth, M. Hutchinson, V. S. Laberge, Y. Maekawa, D. Imao, Iterative protecting group-free cross-coupling leading to chiral multiply arylated structures. *Nat. Commun.* **2016**, *7*, 11065.
- [15] Y. J. Lan, S. Q. Xie, B. Liu, Regioselective 1,2-Di(hetero)arylation of Activated and Unactivated Alkenes with (Hetero)aryl Chlorides. *Org. Lett.* **2025**, *27*(19), 4952-4957.
- [16] L. Zeng, X. H. Ouyang, D. L. He, J. H. Li, Synthesis of Diarylalkanes by Photoreductive 1,2-Diarylation of Alkenes with Aryl Halides and Cyanoaromatics. *J. Org. Chem.* **2024**, *89*(18), 13641-13653.

## 14. <sup>1</sup>H and <sup>13</sup>C NMR spectra

<sup>1</sup>H NMR of **3a** (500 MHz, CDCl<sub>3</sub>)

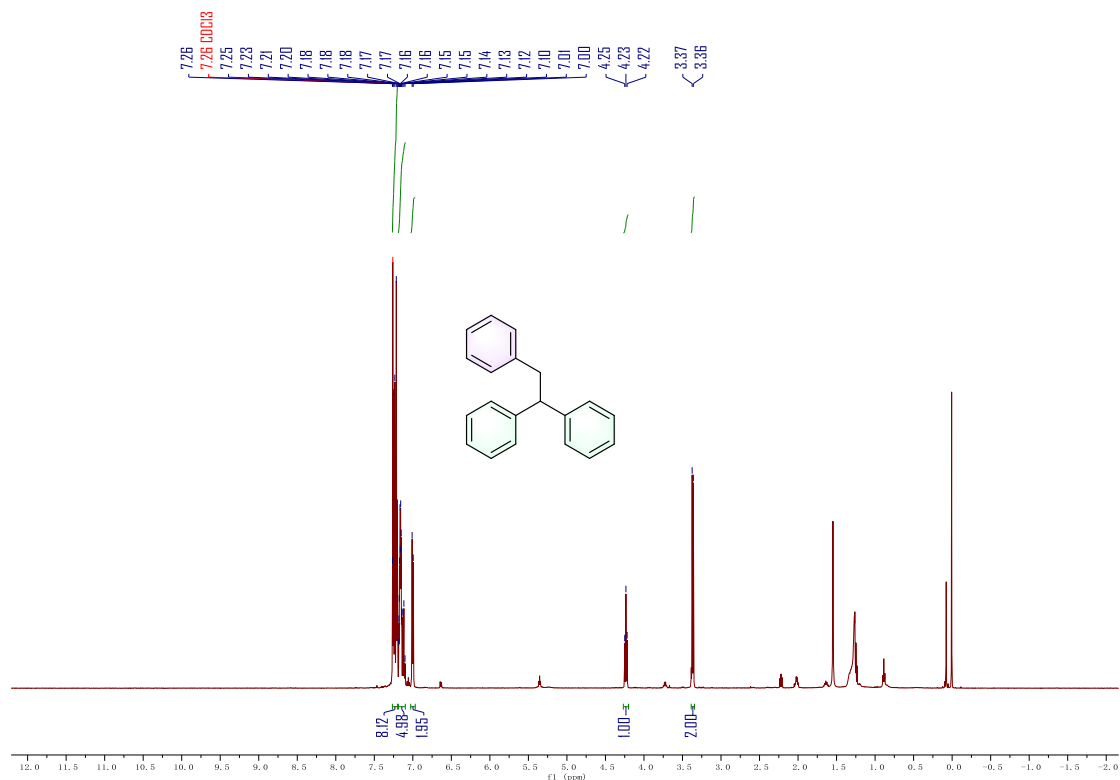

<sup>1</sup>H NMR of **3b** (500 MHz, CDCl<sub>3</sub>)

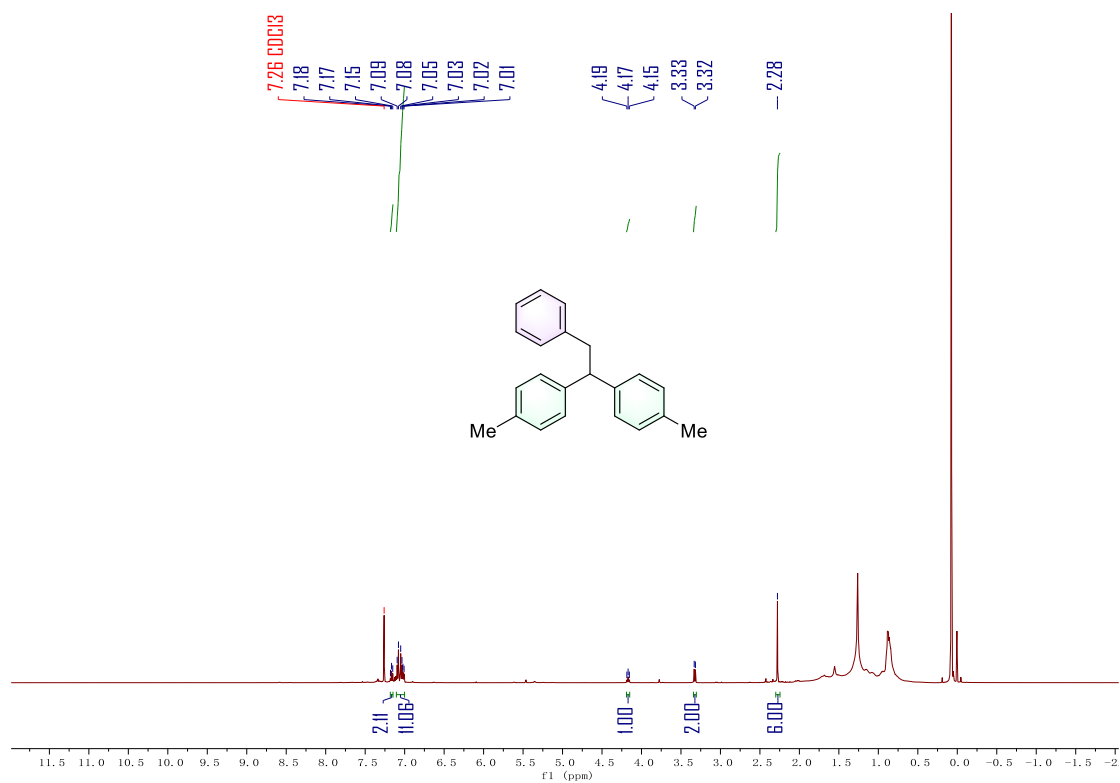

<sup>1</sup>H NMR of **3c** (500 MHz, CDCl<sub>3</sub>)

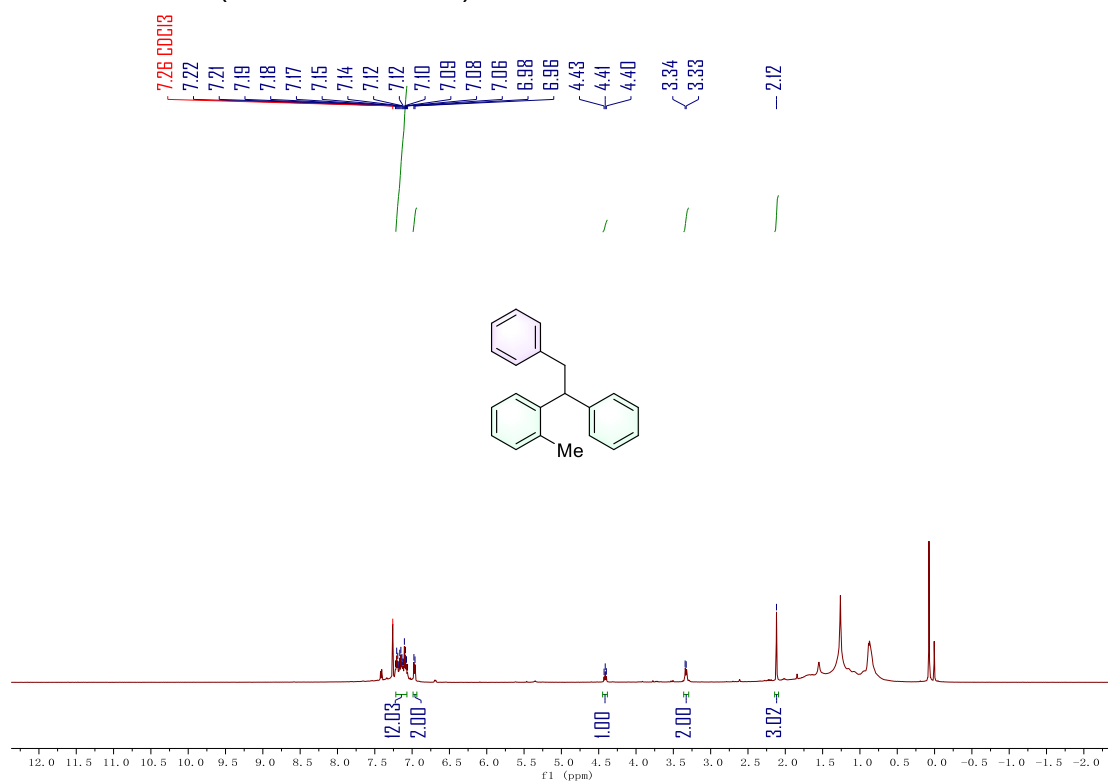

<sup>1</sup>H NMR of **3d** (500 MHz, CDCl<sub>3</sub>)

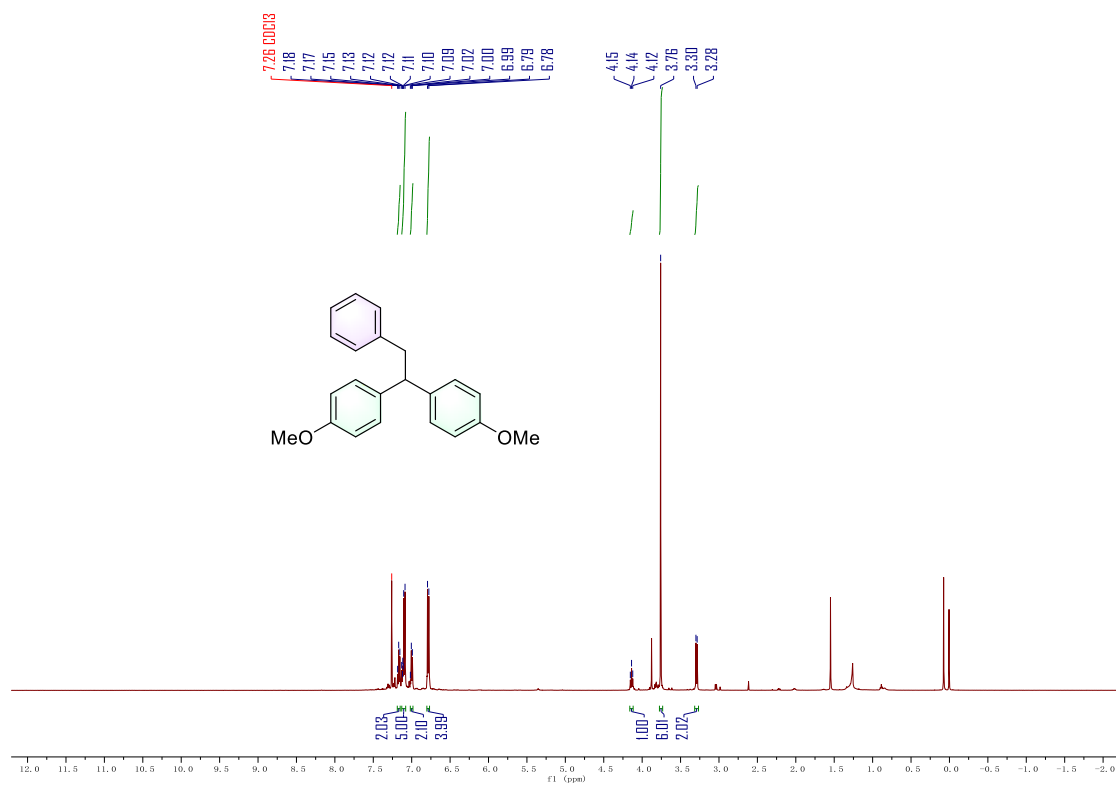

$^1\text{H}$  NMR of **3e** (500 MHz,  $\text{CDCl}_3$ )

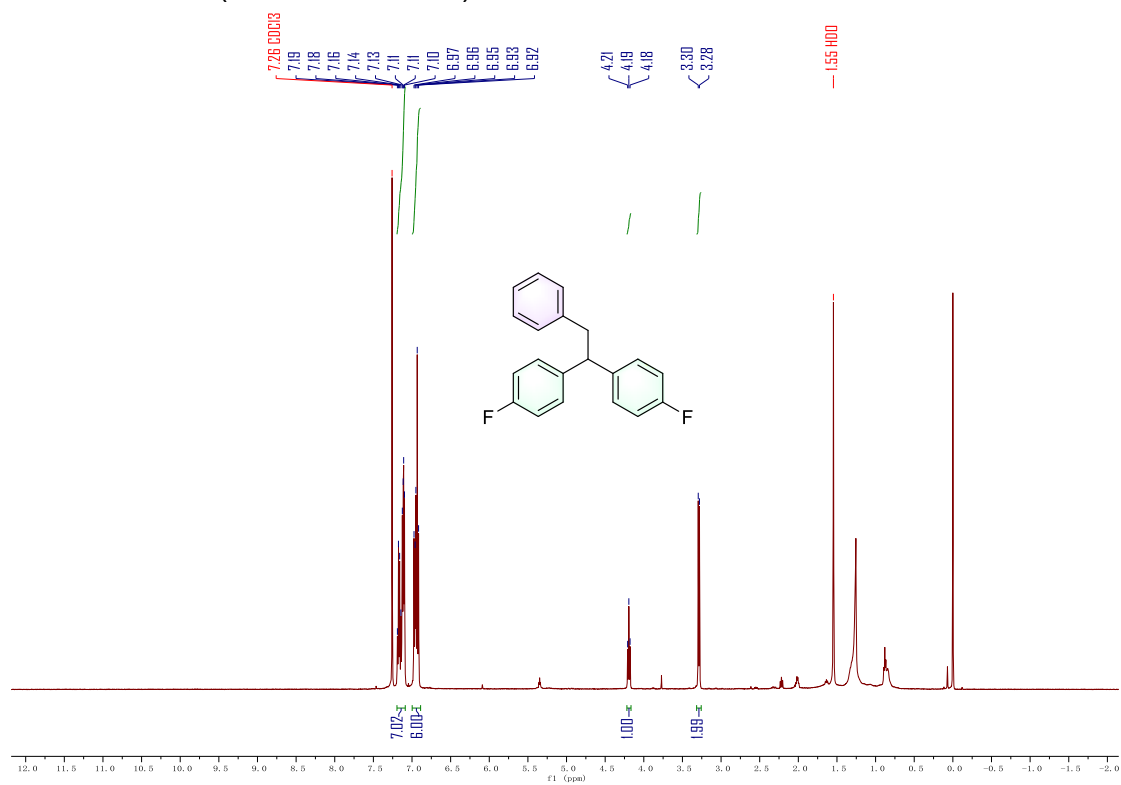

$^{19}\text{F}$  NMR of **3e** (471 MHz,  $\text{CDCl}_3$ )

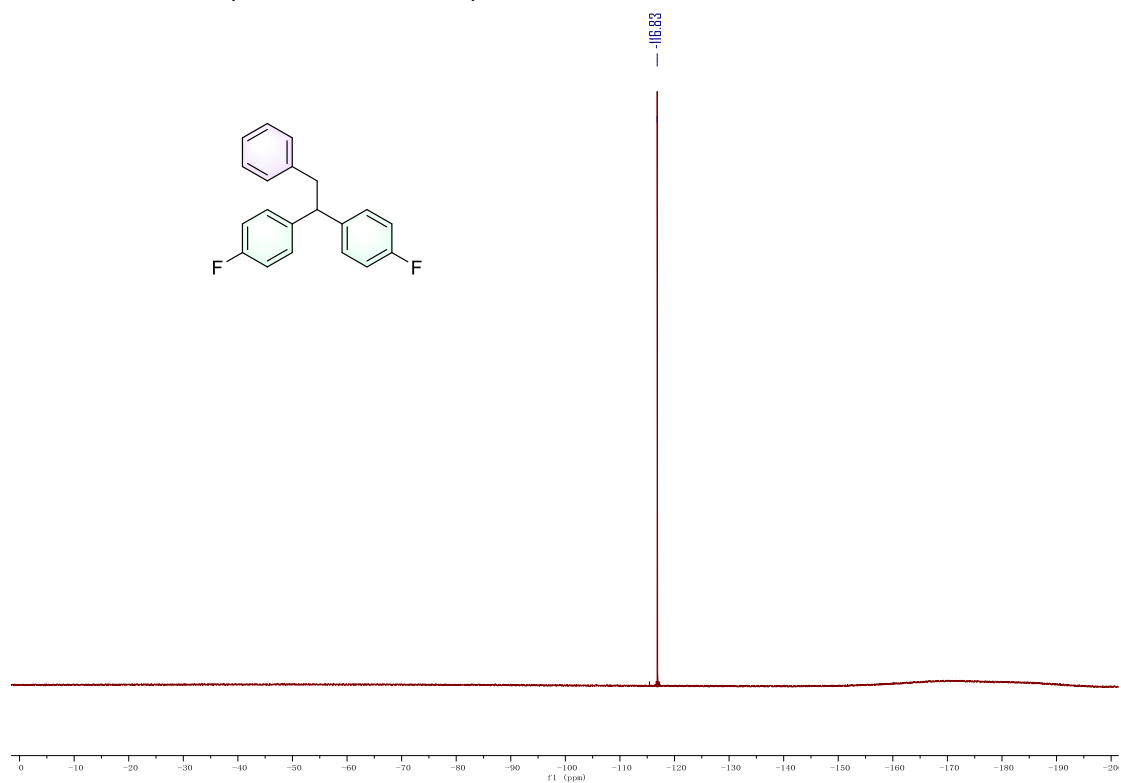

$^1\text{H}$  NMR of **3f** (500 MHz,  $\text{CDCl}_3$ )

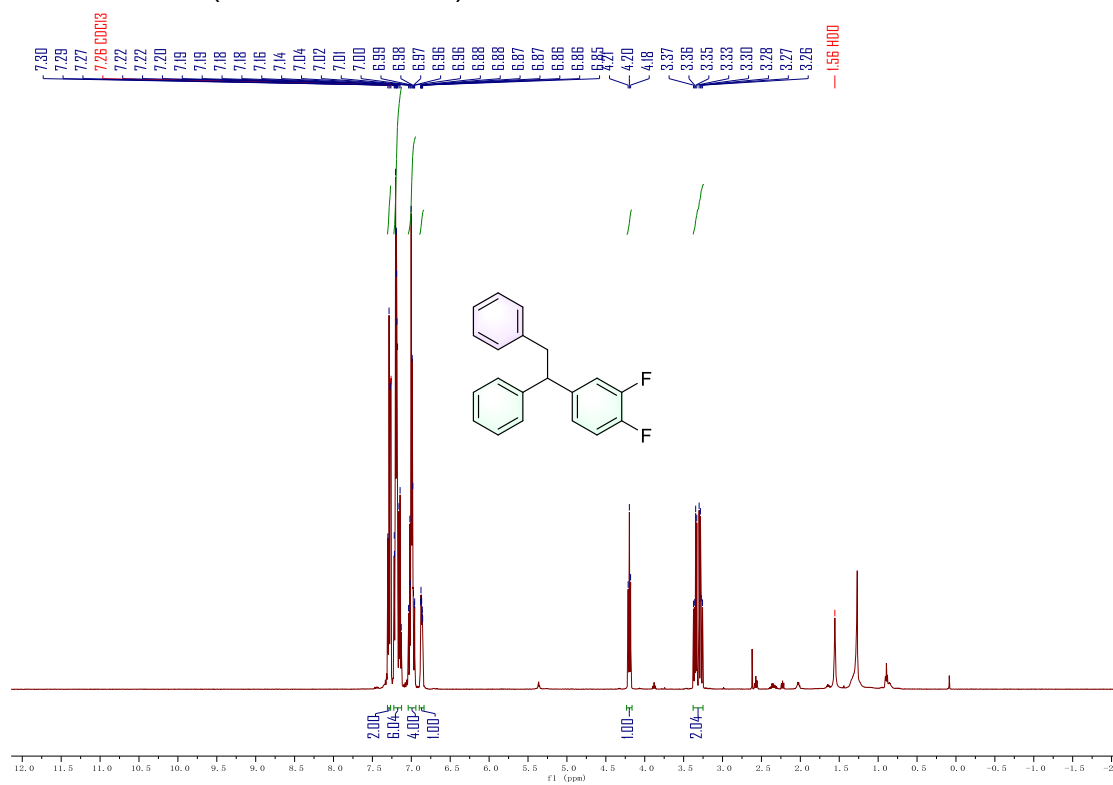

$^{19}\text{F}$  NMR of **3f** (471 MHz,  $\text{CDCl}_3$ )

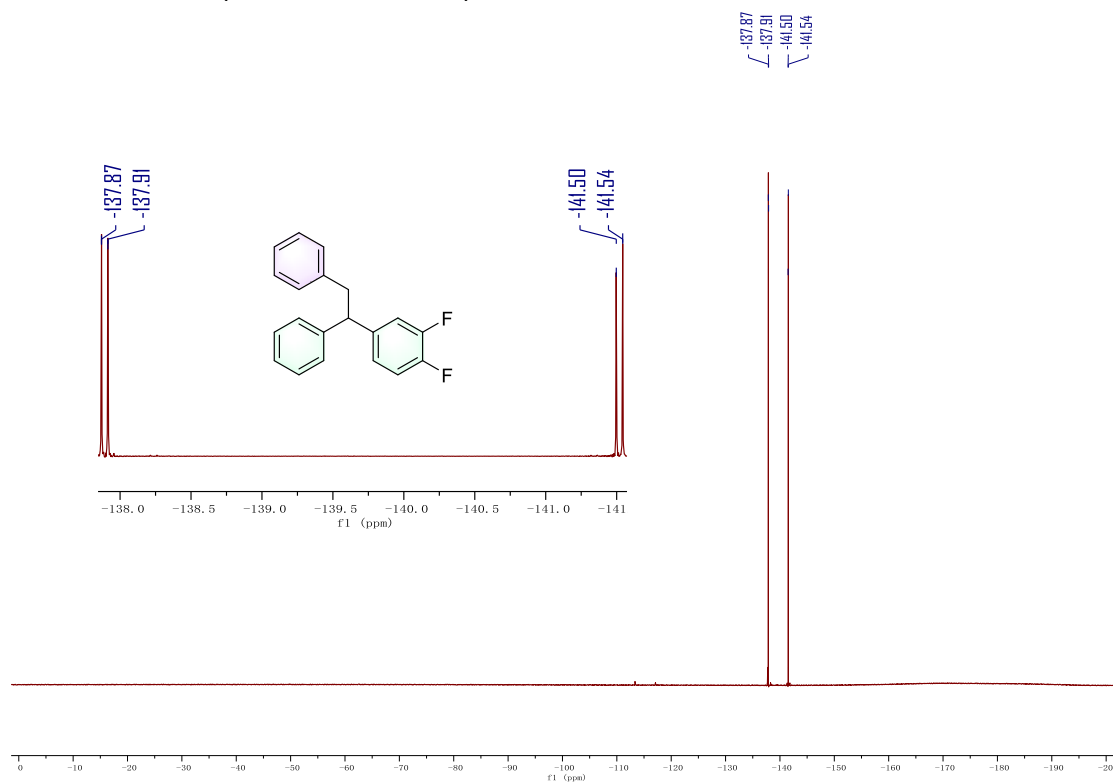

<sup>1</sup>H NMR of **3g** (500 MHz, CDCl<sub>3</sub>)

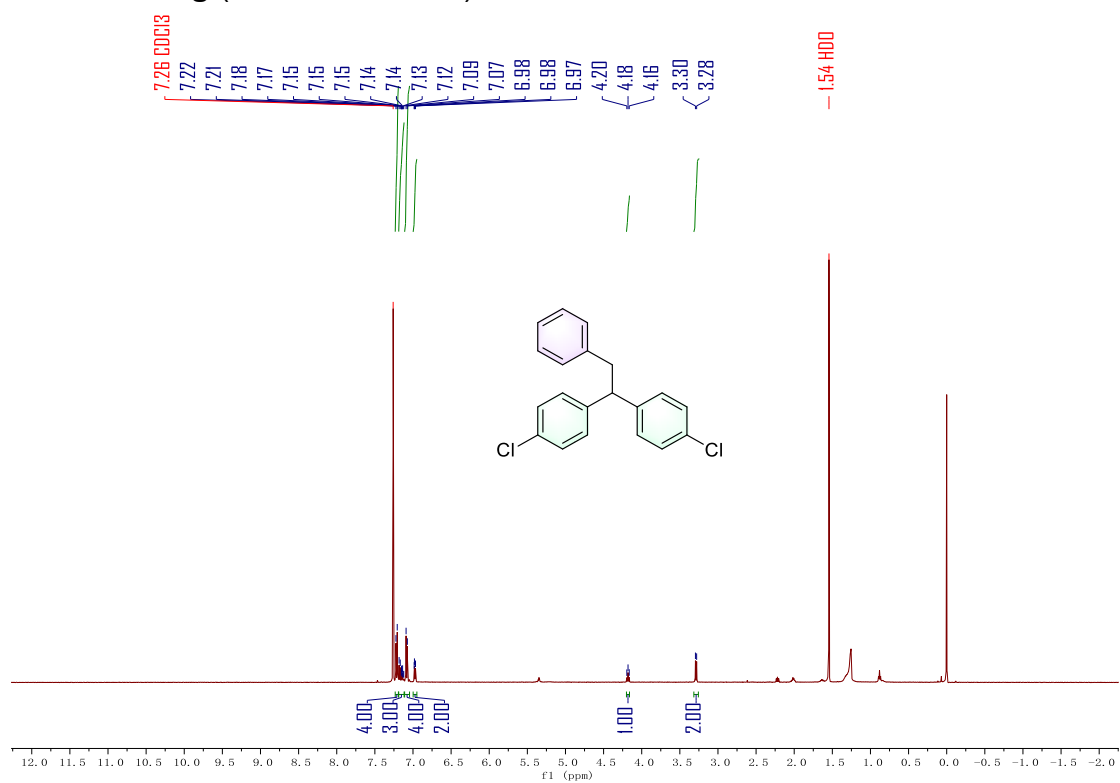

<sup>1</sup>H NMR of **3h** (500 MHz, CDCl<sub>3</sub>)

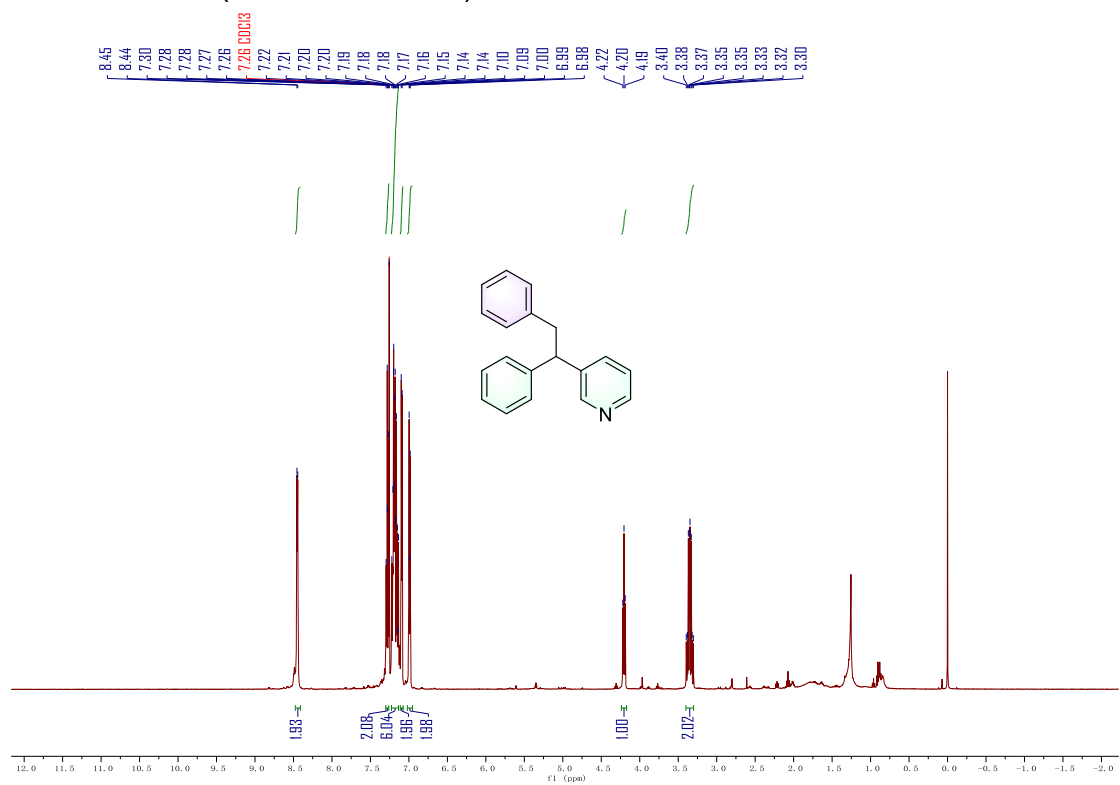

$^1\text{H}$  NMR of **3i** (500 MHz,  $\text{CDCl}_3$ )

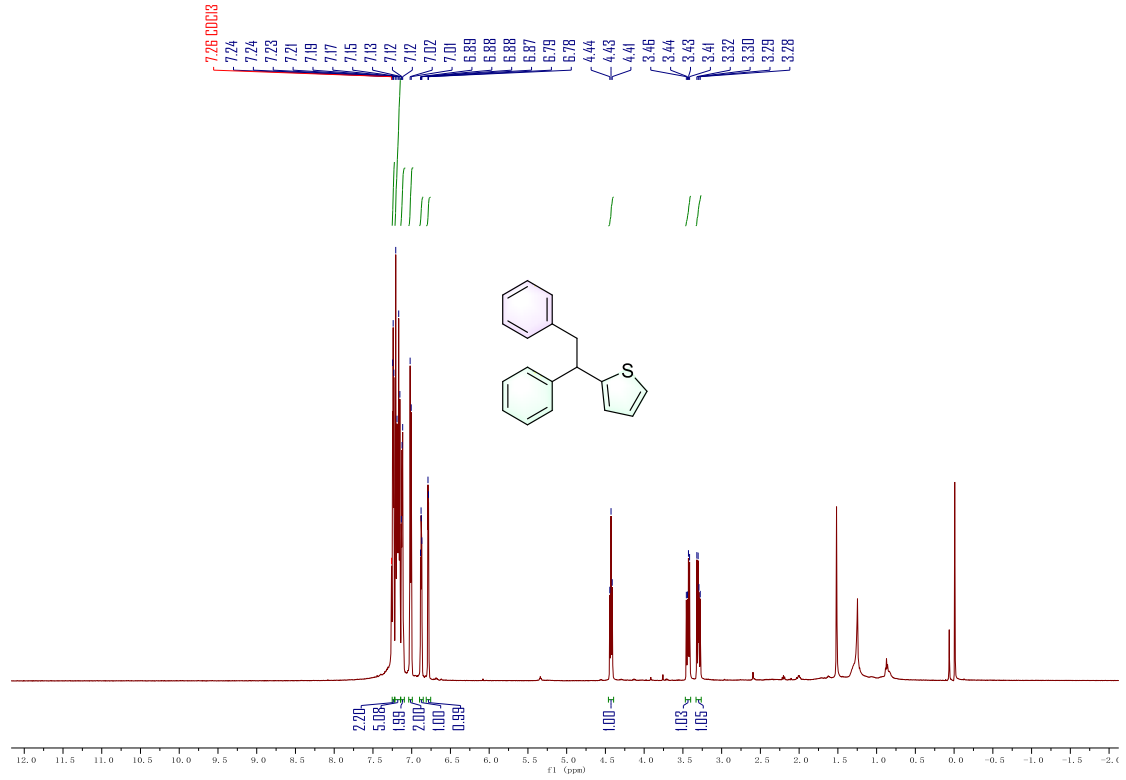

$^1\text{H}$  NMR of **3j** (500 MHz,  $\text{CDCl}_3$ )

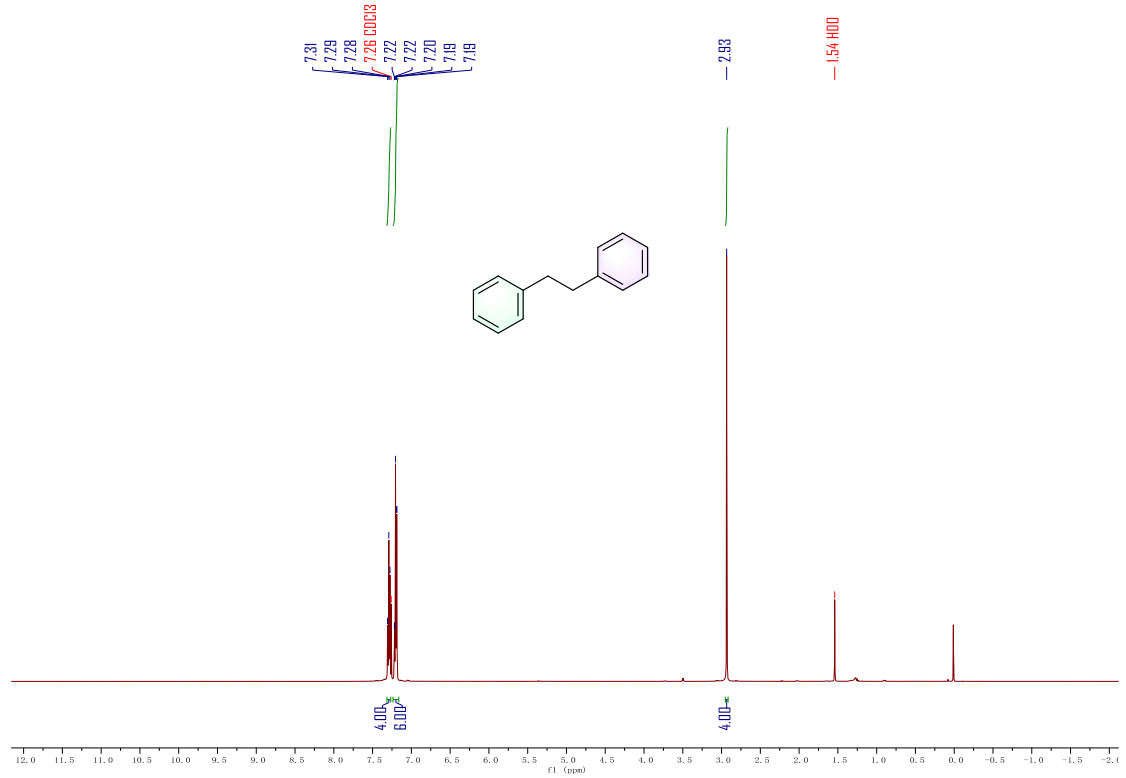

$^1\text{H}$  NMR of **3k** (500 MHz,  $\text{CDCl}_3$ )

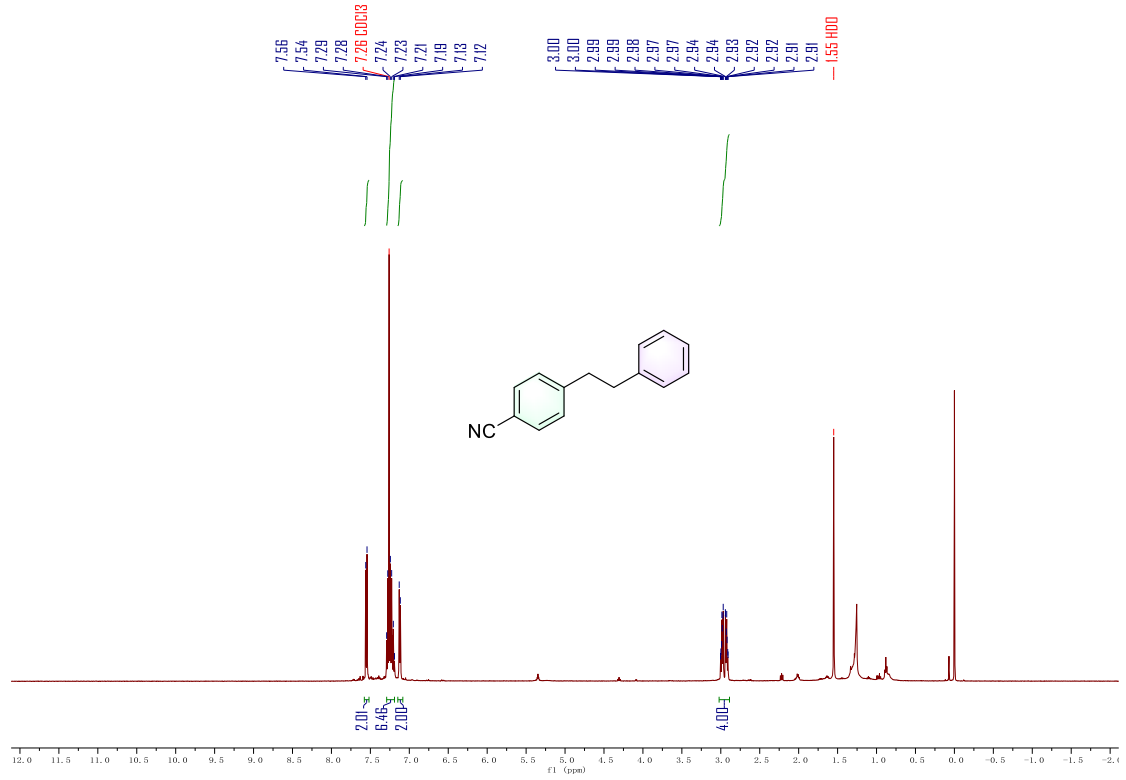

$^1\text{H}$  NMR of **3l** (500 MHz,  $\text{CDCl}_3$ )

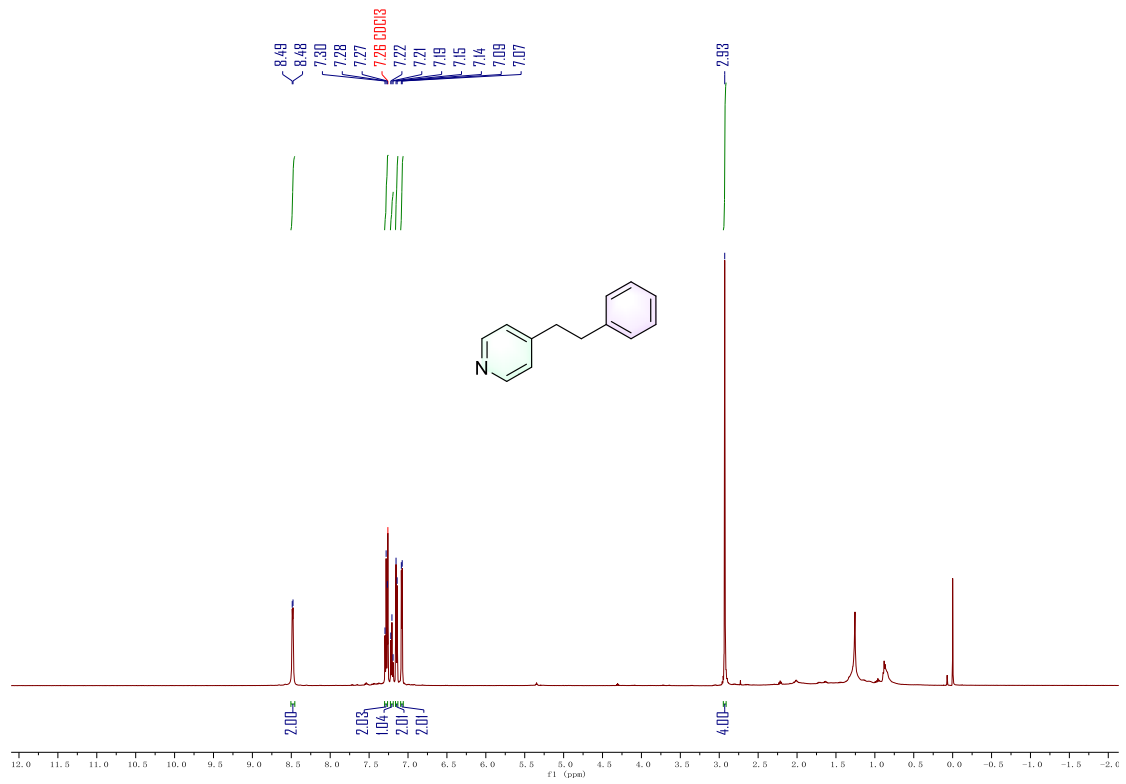

$^1\text{H}$  NMR of **3m** (500 MHz,  $\text{CDCl}_3$ )

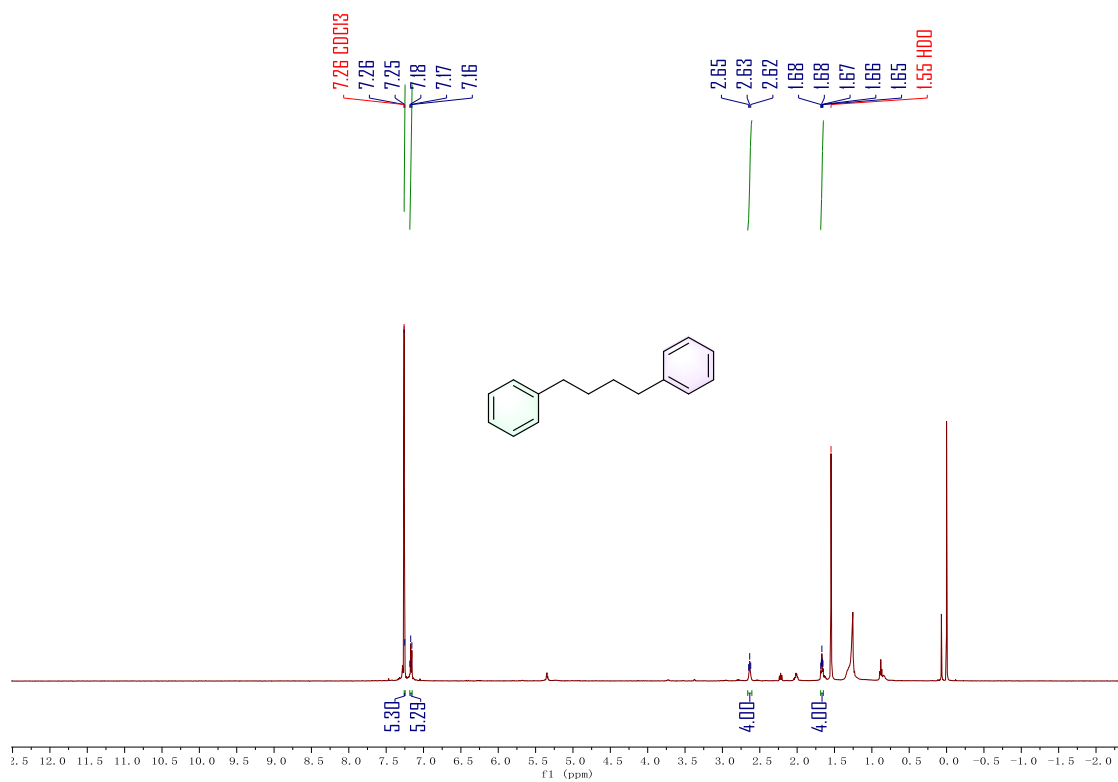

$^1\text{H}$  NMR of **3n** (500 MHz,  $\text{CDCl}_3$ )

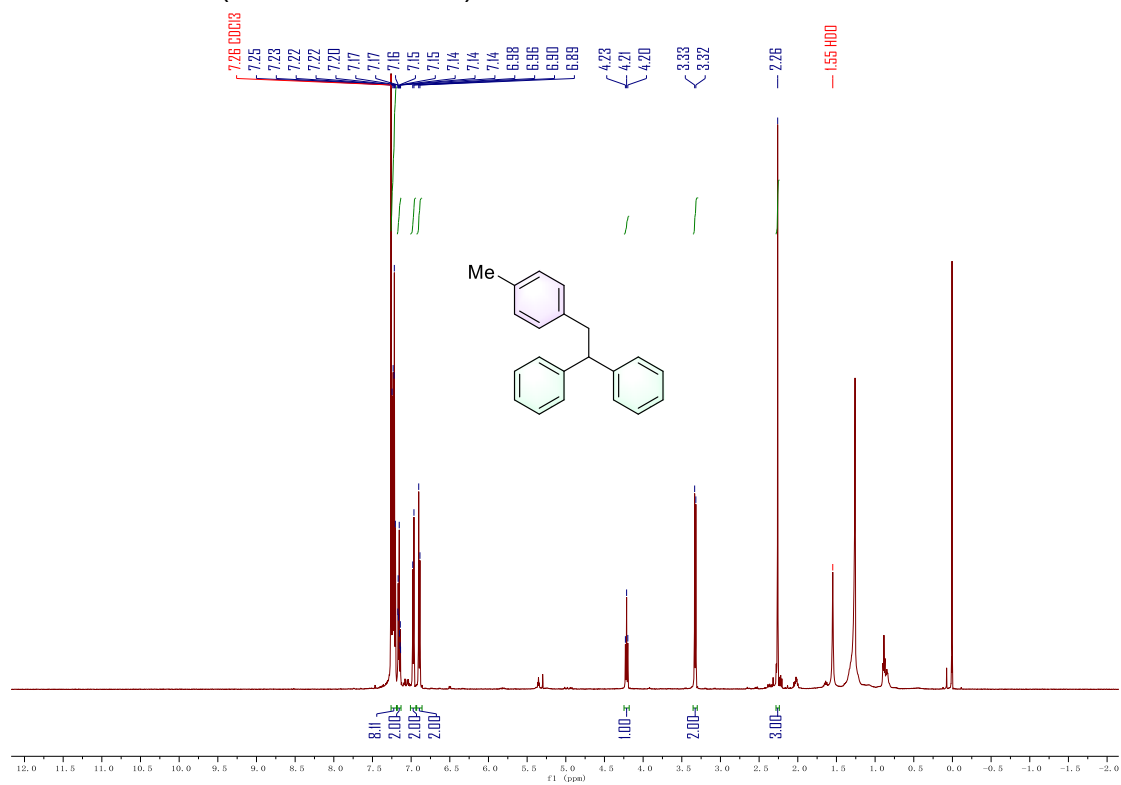

$^1\text{H}$  NMR of **3o** (500 MHz,  $\text{CDCl}_3$ )

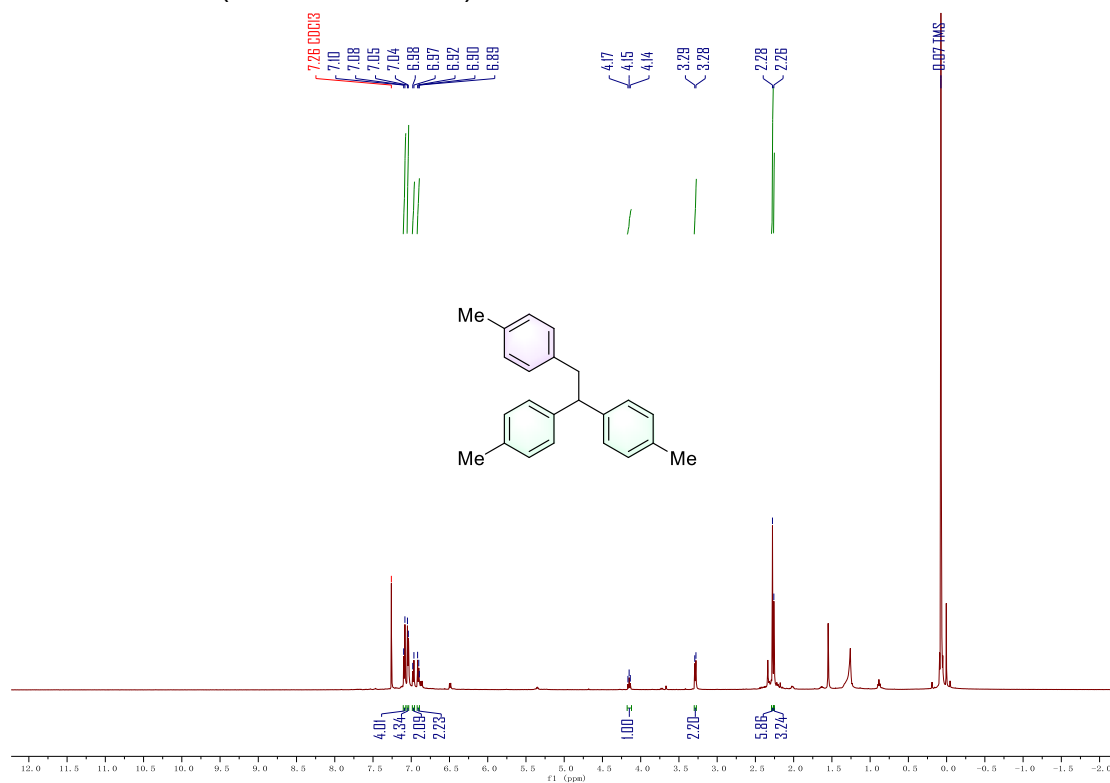

$^1\text{H}$  NMR of **3p** (500 MHz,  $\text{CDCl}_3$ )

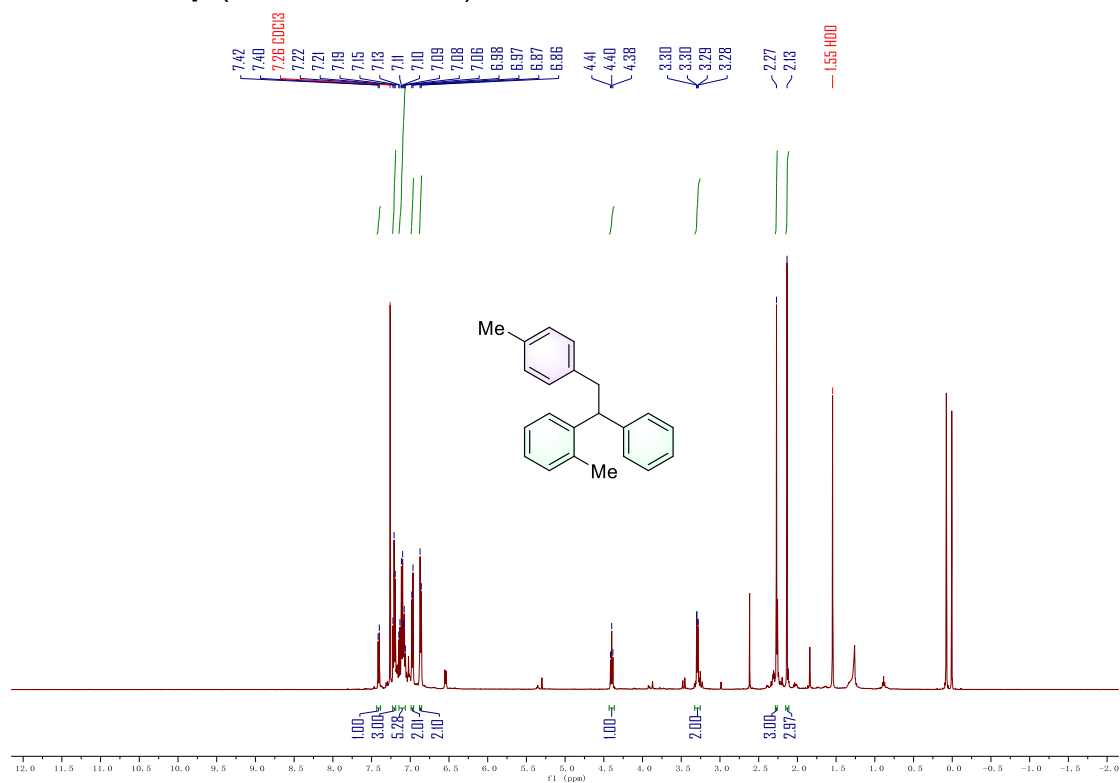

$^1\text{H}$  NMR of **3q** (500 MHz,  $\text{CDCl}_3$ )

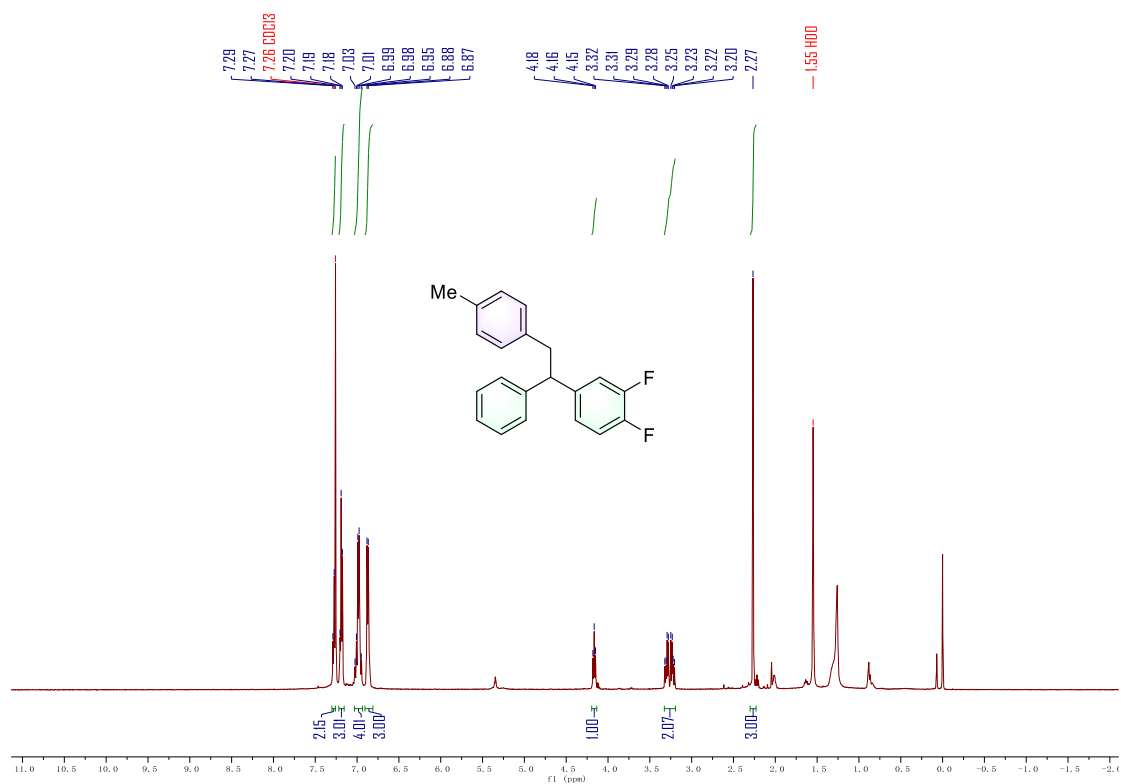

$^{19}\text{F}$  NMR of **3q** (471 MHz,  $\text{CDCl}_3$ )

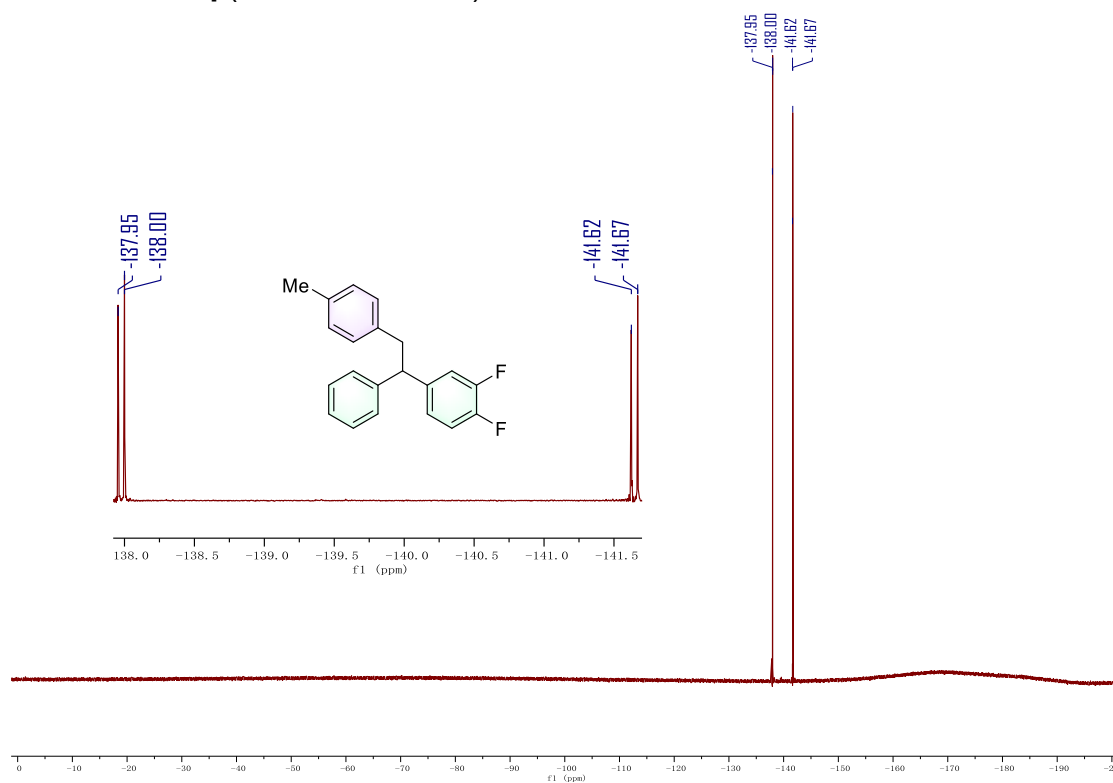

$^1\text{H}$  NMR of **3r** (500 MHz,  $\text{CDCl}_3$ )

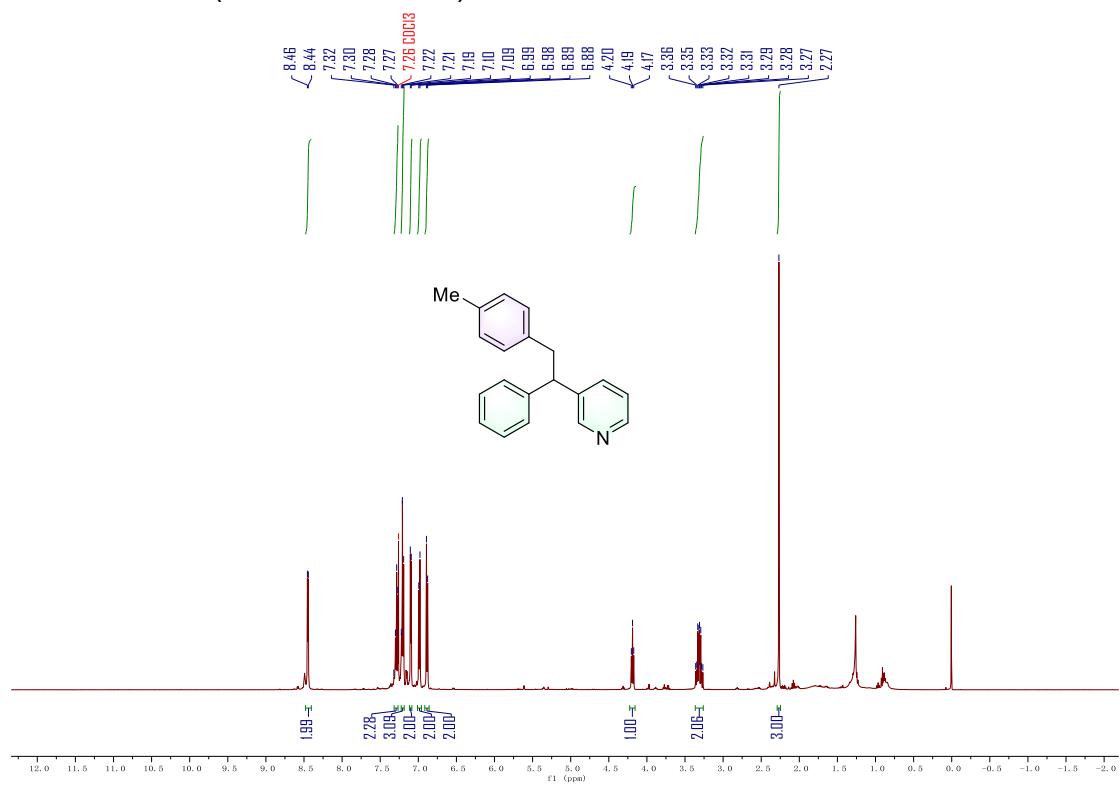

$^{13}\text{C}$  NMR of **3r** (126 MHz,  $\text{CDCl}_3$ )

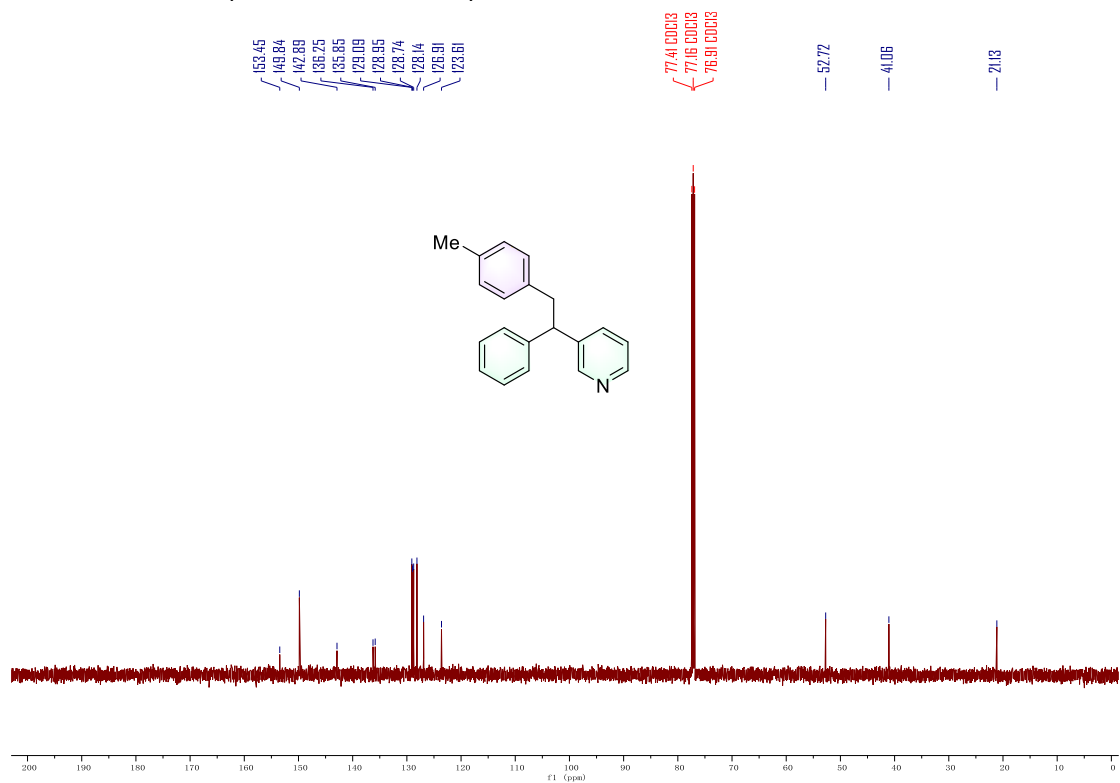



<sup>1</sup>H NMR of **3u** (500 MHz, CDCl<sub>3</sub>)

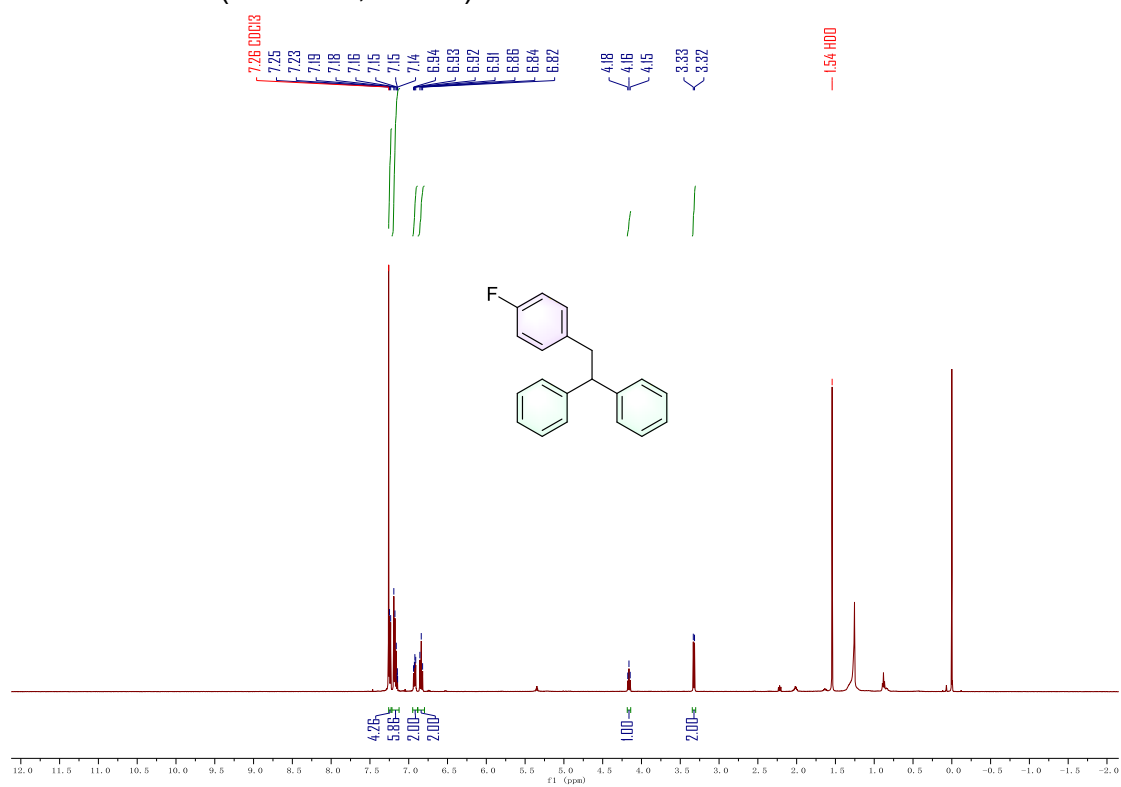

<sup>19</sup>F NMR of **3u** (471 MHz, CDCl<sub>3</sub>)

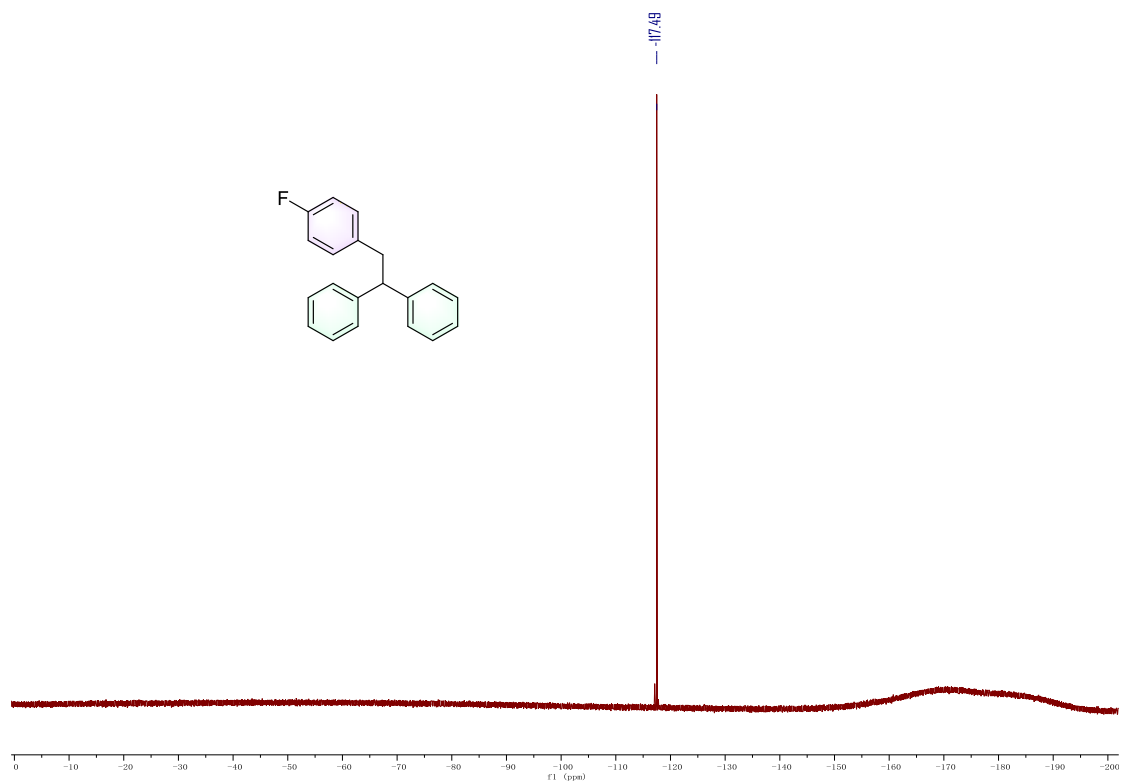



$^{13}\text{C}$  NMR of **3w** (126 MHz,  $\text{CDCl}_3$ )

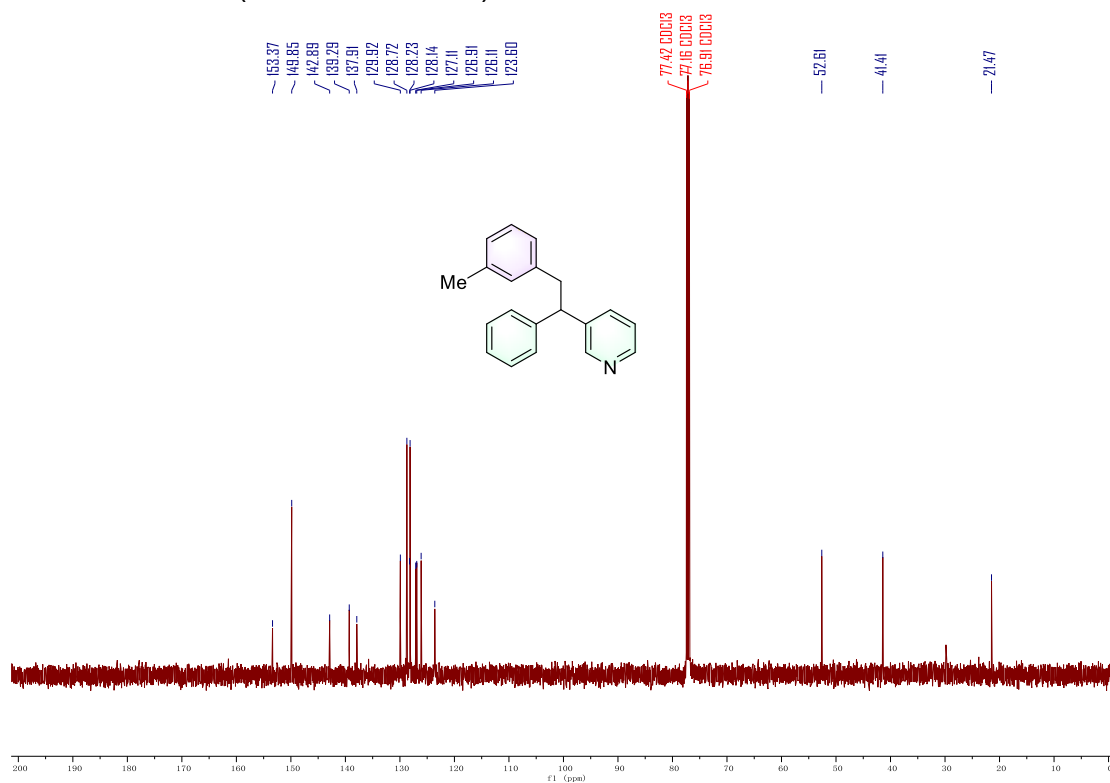

$^1\text{H}$  NMR of **3x** (500 MHz,  $\text{CDCl}_3$ )

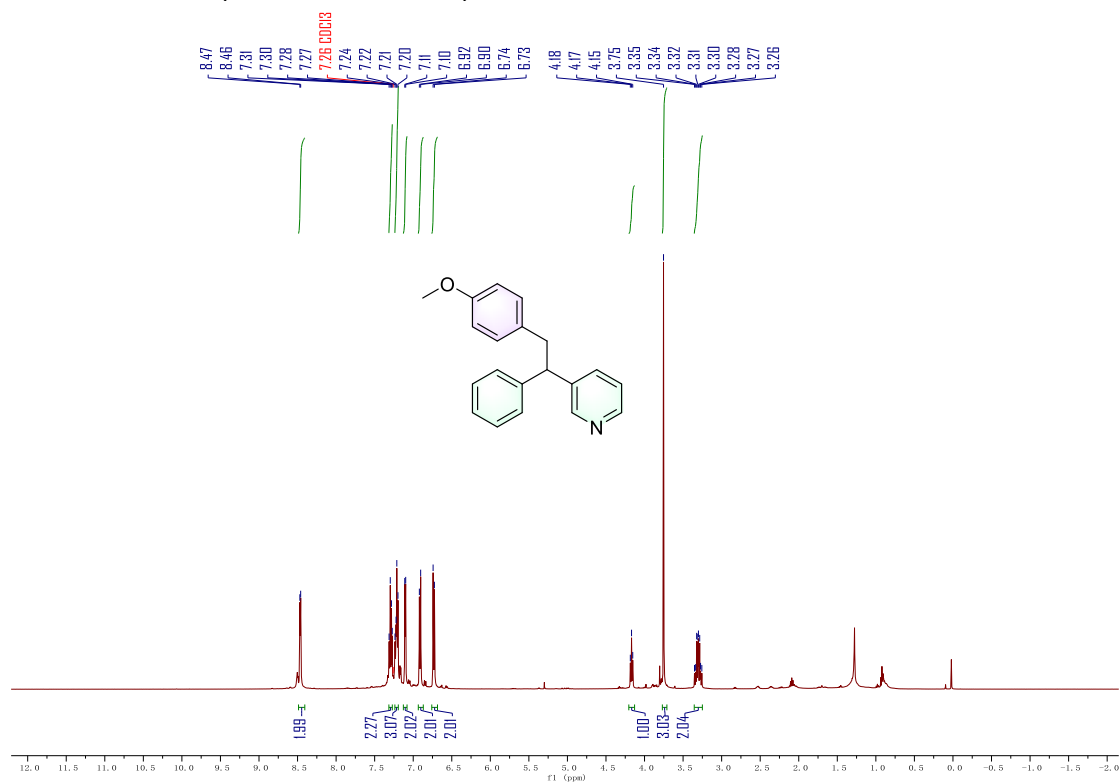

$^{13}\text{C}$  NMR of **3x** (126 MHz,  $\text{CDCl}_3$ )

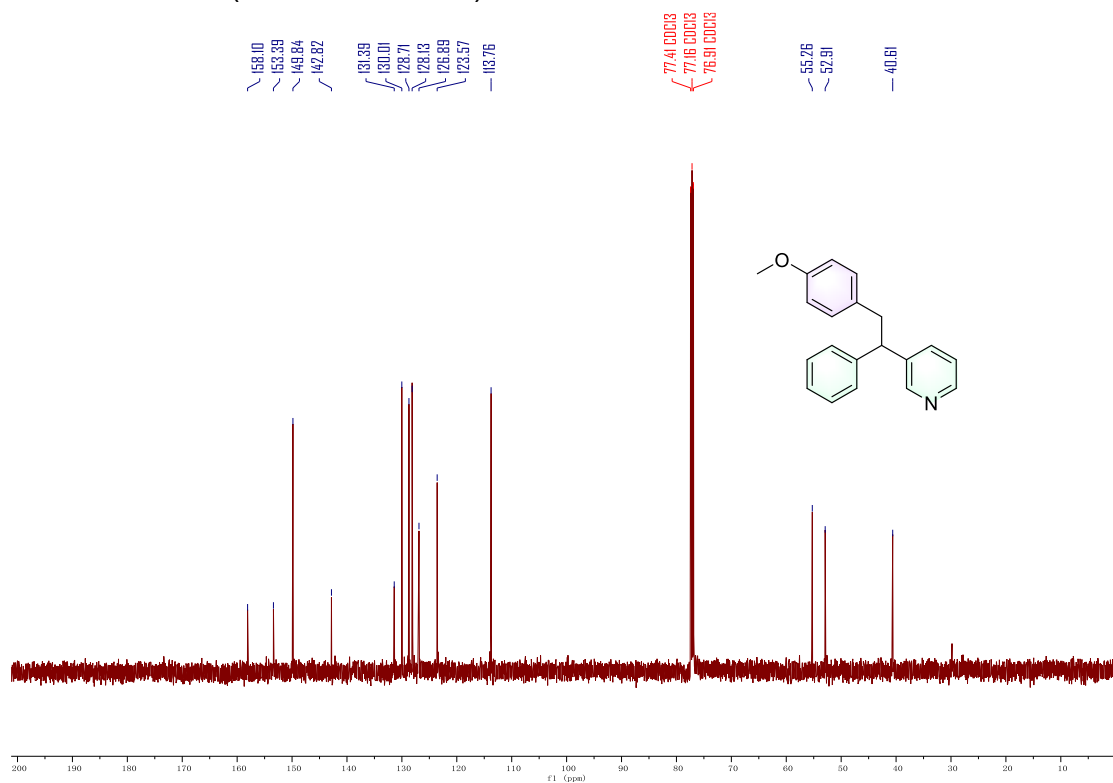

$^1\text{H}$  NMR of **3y** (500 MHz,  $\text{CDCl}_3$ )

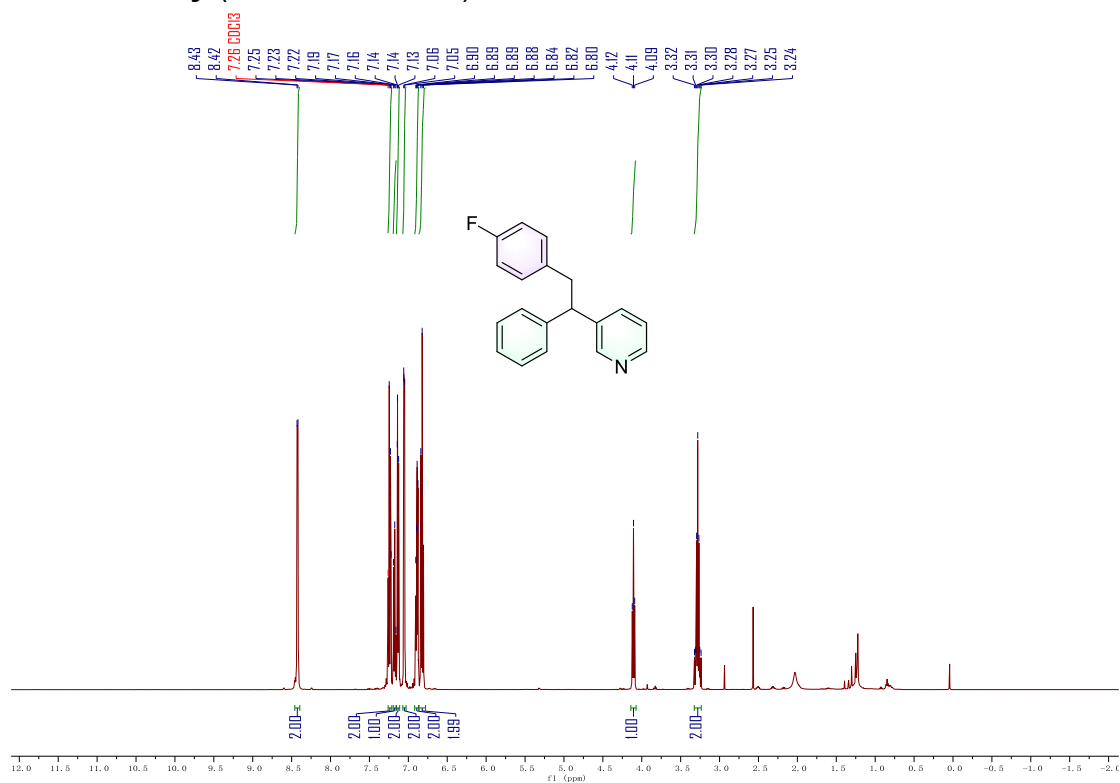

<sup>13</sup>C NMR of **3y** (126 MHz, CDCl<sub>3</sub>)

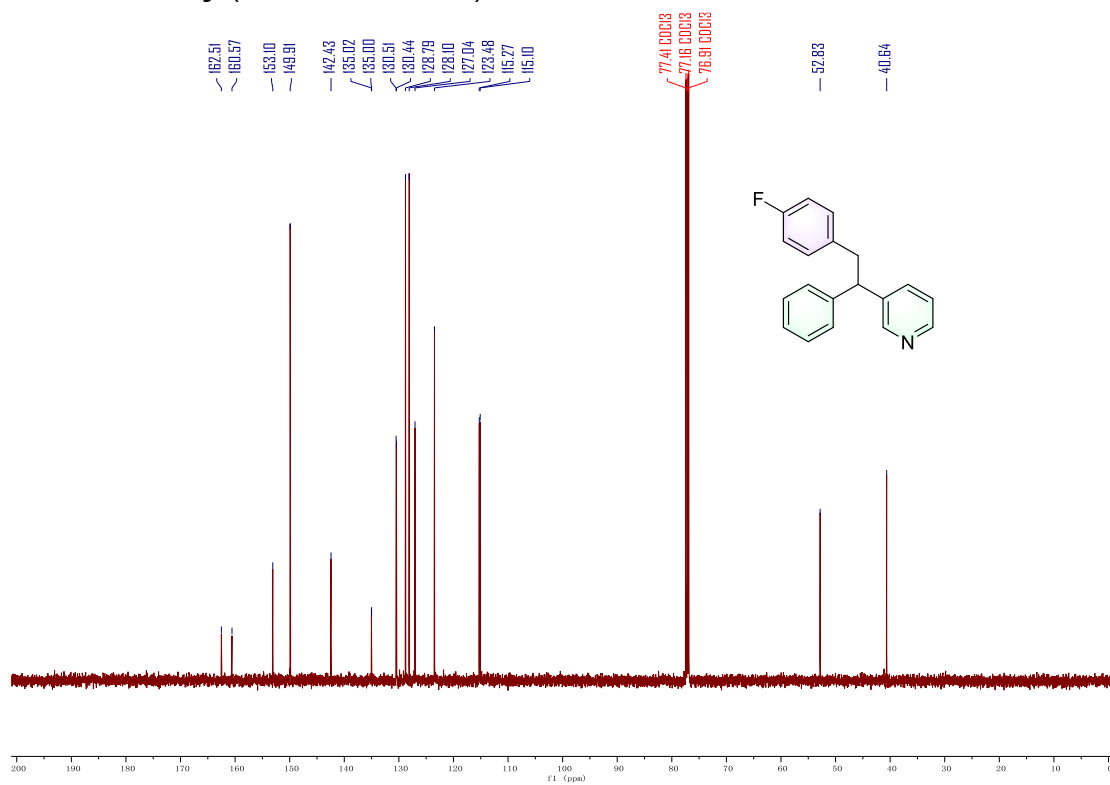

<sup>19</sup>F NMR of **3y** (471 MHz, CDCl<sub>3</sub>)

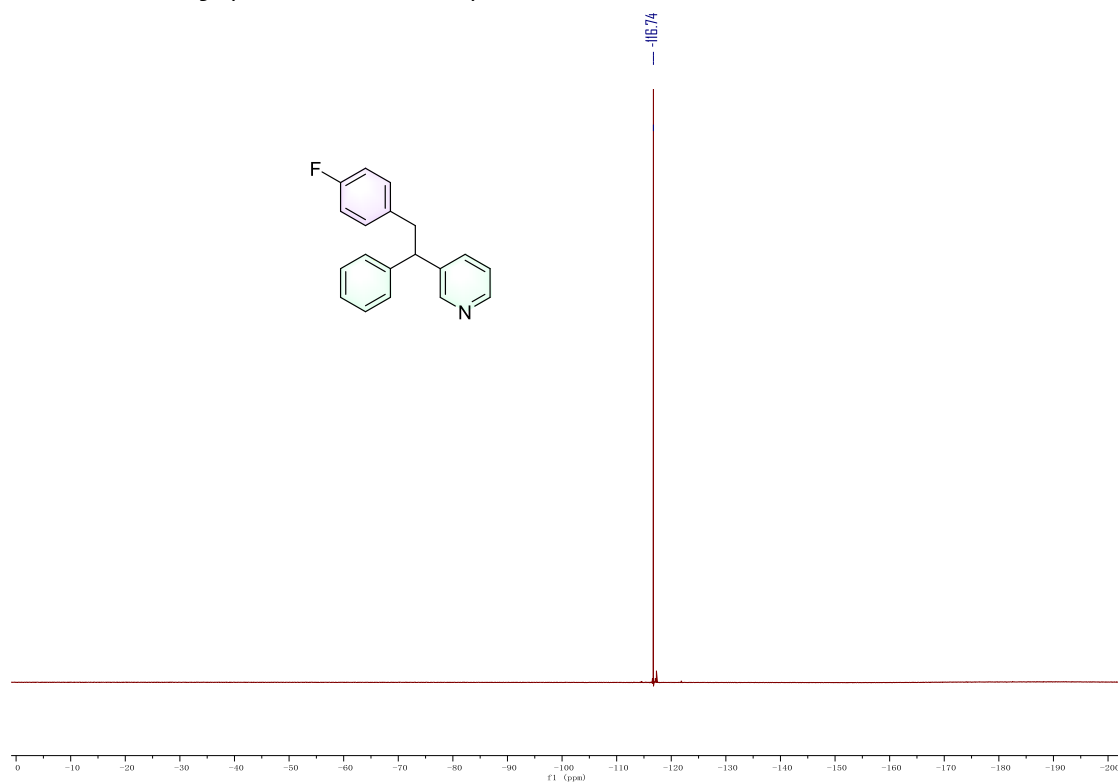

$^1\text{H}$  NMR of **3z** (500 MHz,  $\text{CDCl}_3$ )

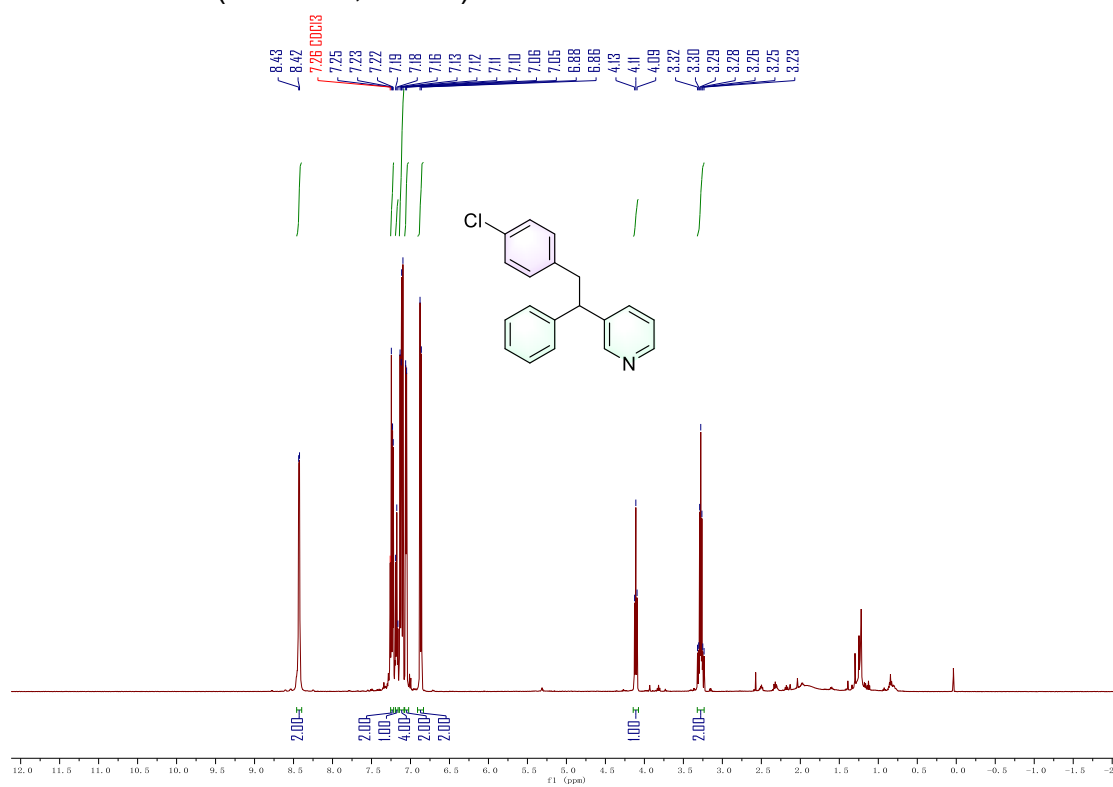

$^{13}\text{C}$  NMR of **3z** (126 MHz,  $\text{CDCl}_3$ )

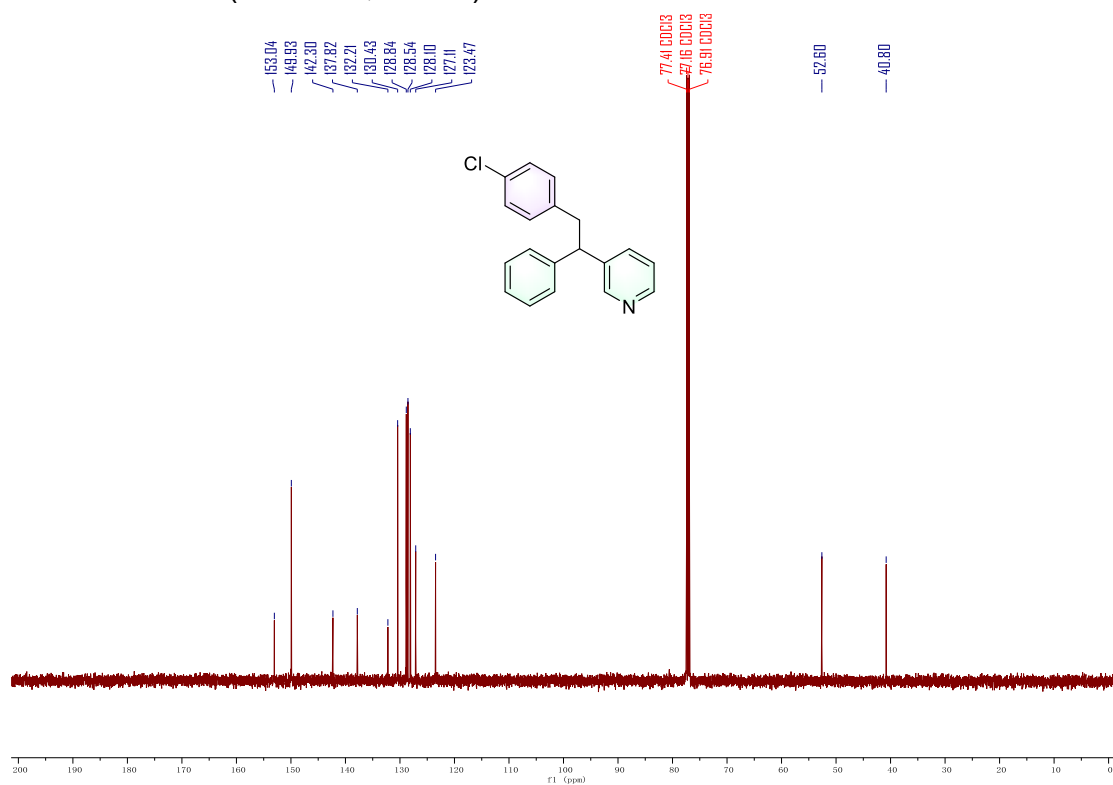

<sup>1</sup>H NMR of **3aa** (500 MHz, CDCl<sub>3</sub>)

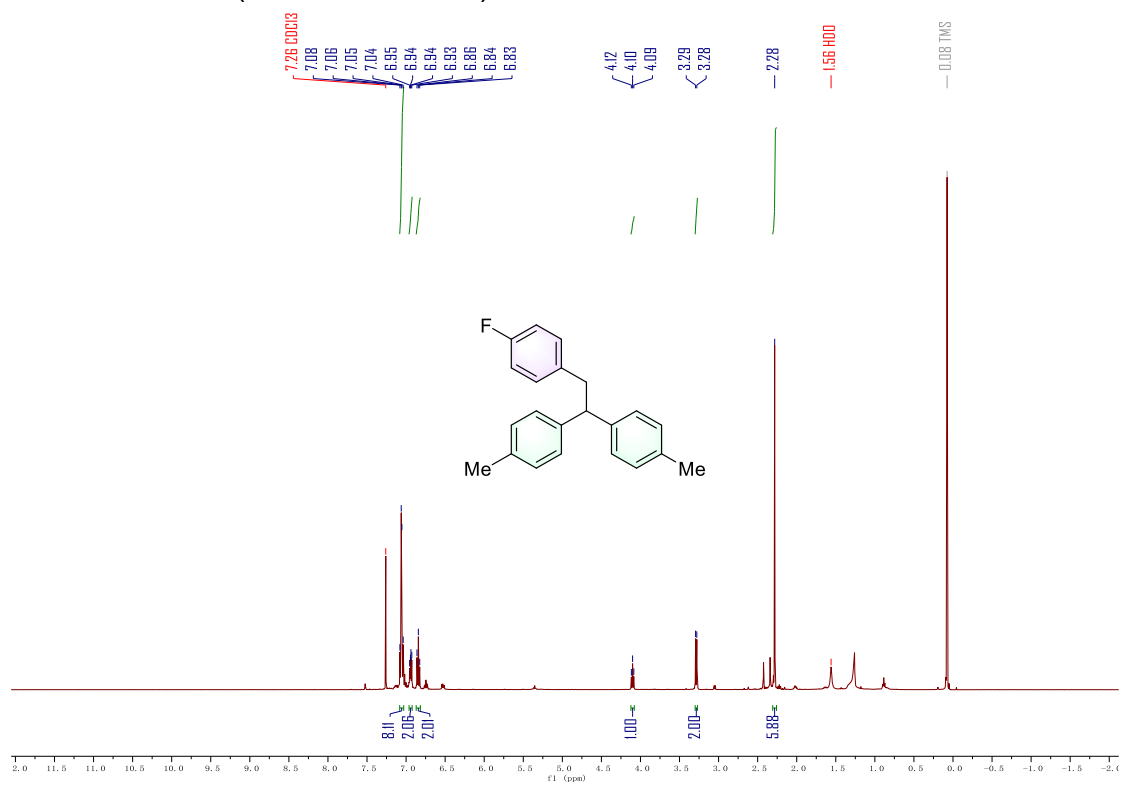

<sup>19</sup>F NMR of **3aa** (471 MHz, CDCl<sub>3</sub>)

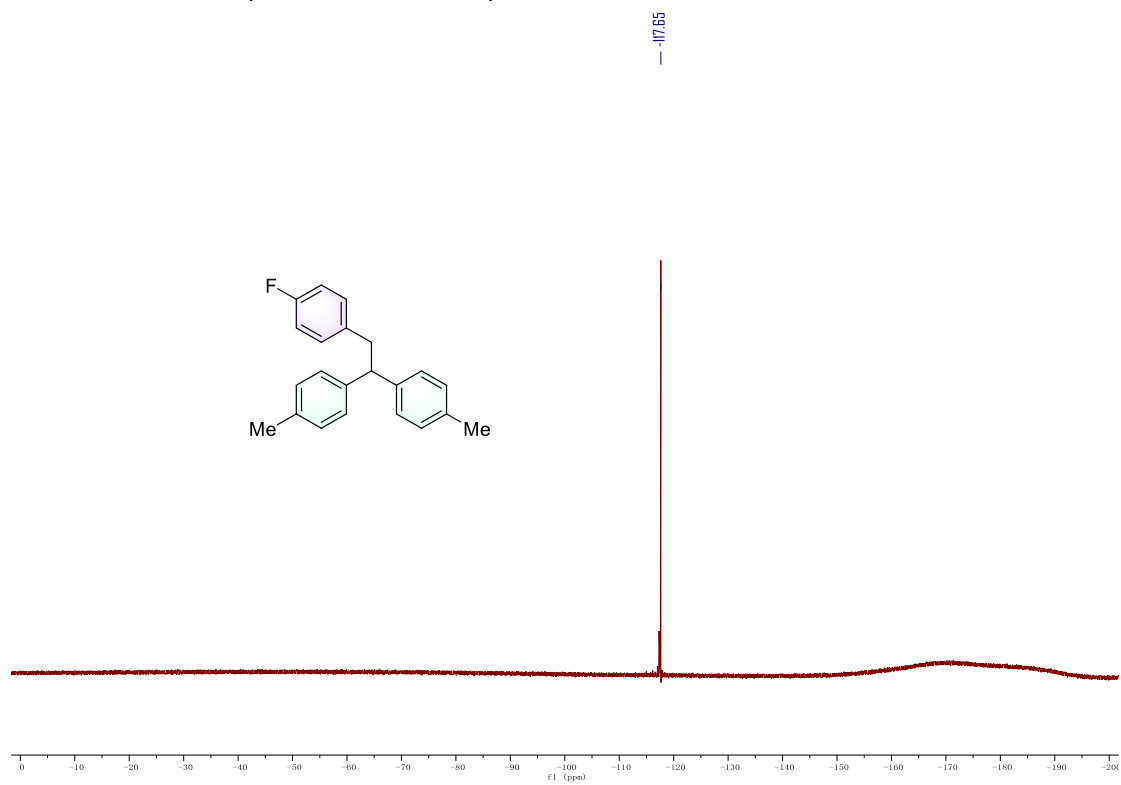

$^{19}\text{F}$  NMR of **3ab** (471 MHz,  $\text{CDCl}_3$ )

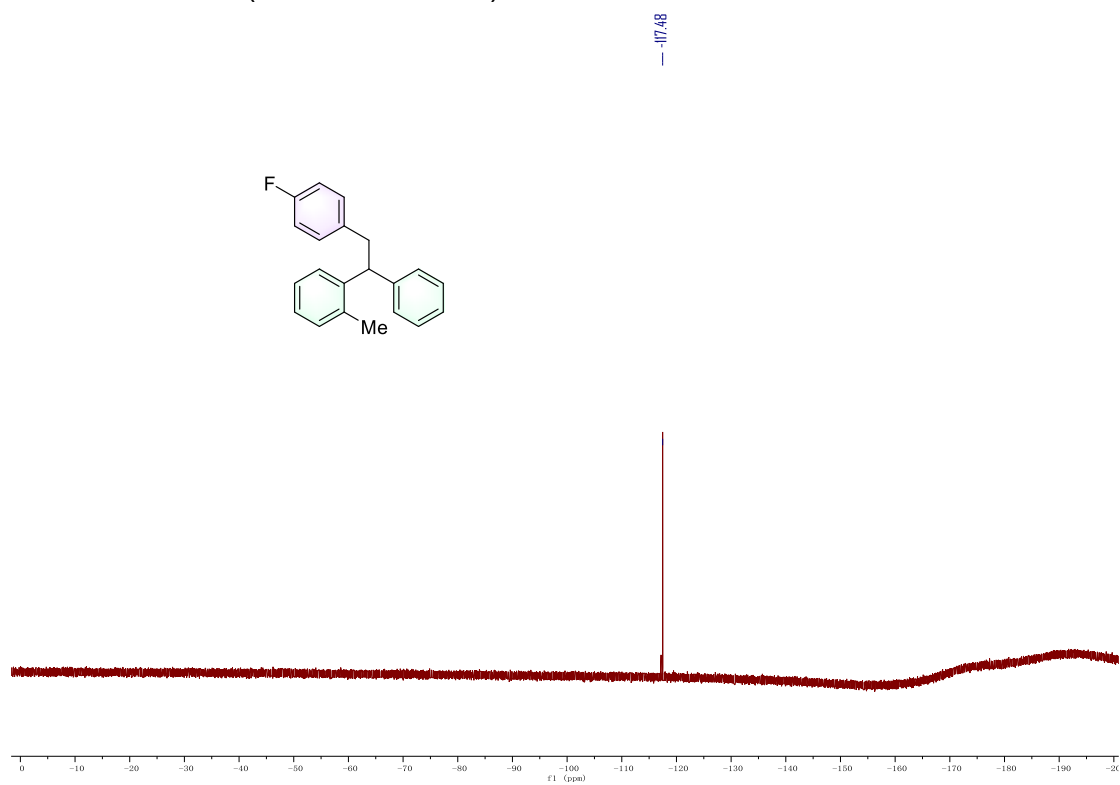

$^1\text{H}$  NMR of **3ac** (500 MHz,  $\text{CDCl}_3$ )

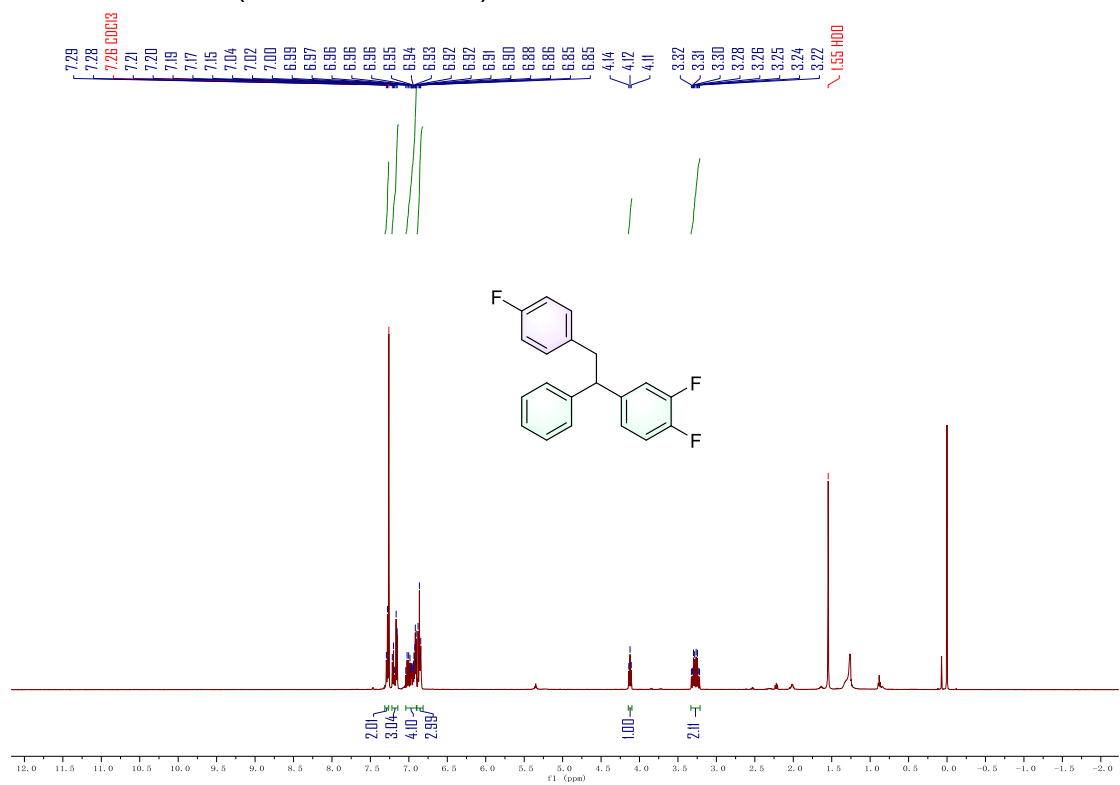

$^{19}\text{F}$  NMR of **3ac** (471 MHz,  $\text{CDCl}_3$ )

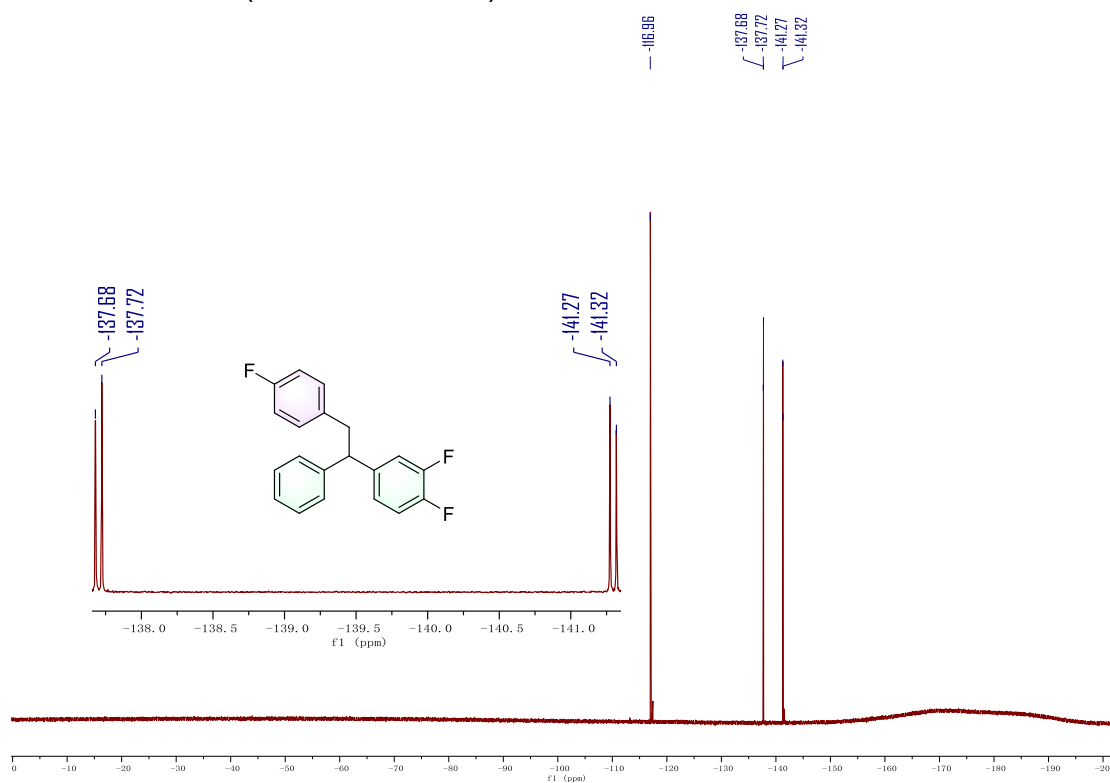

Supplement: d6ob00414h1.pdf [file d6ob00414h1.pdf]
